# Supplementary material for: Behavioural and Psychiatric Phenotypes in Men and Boys with X-Linked Ichthyosis: Evidence from a Worldwide Online Survey
Source: PLoS One. 2016 Oct 6;11(10):e0164417. doi: 10.1371/journal.pone.0164417 (PMC5053497; doi:10.1371/journal.pone.0164417)
Supplement: S1 Table — (XLSX) [file pone.0164417.s001.xlsx]

## Sheet: Demographic data 
	Q2	Q4	Q5	Q6	Q7	Q9_1	Q11	Q13	Q14	Q15	Q16	Q17
Participant number	How old are you?	In which country do you live?	Which hand do you use most frequently?	What is your ethnic origin?	What is your highest level of education?	How was your XLI diagnosed or confirmed? -Appearance of skin by specialist or non-specialist doctor-physician	If XLI was confirmed by genetic test, do you know which mutation was found? 1=typical deletion, 2=atypical deletion, 3=point mutation within STS, 4=don't know	How would you describe your personality? 1=optimistic and social, 2=short-tempered or irritable, 3=analytical and quiet, 4=relaxed and peaceful	Do you have any talents or disabilites of note? 1=yes, 2=no	If yes, please provide further details	Have you ever been diagnosed with a brain-related condition (e.g. a developmental disorder such as autism spectrum disorder, ADHD or dyslexia, a psychiatric disorder such as depression, schizophrenia or bipolar disorder, or a neurodegenerative condition such as Alzheimer’s or Parkinson’s Disease?) 1=yes, 2=no	If yes, please give conditions, main symptoms and approximate age at diagnosis	Other comments
			1=right, 2=left, 3=both		1=no formal education, 2=high school, 3=college or University, 4=postgraduate
1	23	USA	1	White	3	Skin appearance and family history		1	2		2
2	57	Canada	1	Scotish	3	-		2	2		1	depression assumed to be caused by OCD
3	52	united kingdom	3	white	2	Skin appearance and family history		4	1		2
4	33	USA	1	White	3	Skin appearance and family history		3	1	Music	2
5	62	Finland	1	-	1	Don't know		1	1		2
6	19	Pakistan	1	Pashtun	3	Skin appearance and family history		4	2		1	Some time i feel depression.
7	79	Switzerland	1	Caucasian and jewish	2	Skin appearance, family history and genetic test	4	1	1	Average vision but since infancy eye problems. Poor memory. Handy. Neat. Skillful.	2
8	75	Portugal	1	White & jew	3	Skin appearance and family history		1	1	Artistic ( ceramic)	2
9	25	france	1	tunisa	3	Don't know		4	2		1	-
10	35	turkey	1	Caucasian	4	Skin appearance and family history		3	2		2
11	60	united states	1	armenian	3	Skin appearance, family history and biochemical test		1	2		-
12	25	India	1	-	2	Don't know		4	1		2
13	30	ENGLAND	1	WHITE ENGLISH	3	Skin appearance, family history and genetic test	1	3	1	MARTIAL ARTS AND FITNESS	1	DEPRESSION - APPROX 18 YRS ONWARDS (TOO MUCH PRESSURE TRYING TO KEEP EVERYONE ELSE HAPPY RATHER THAN MYSELF)
14	24	ingland	3	spanish white	2	Don't know		2	2		2
15	70	Spain	1	English	2	Skin appearance and family history		1	1	Artist, Love to learn new things.	2
16	68	UK	1	White	3	Skin appearance and family history		3	2		2
17	46	usa	1	white	1	Skin appearance and family history		3	1	cant spell good	1	Depression,13
18	26	England	1	English	3	Skin appearance and family history		3	2		2
19	47	USA	1	White	2	Skin appearance and family history		2	1	Ankylosing Spidylitis, herniations	1	Anxiety, Depression
20	82	usa	1	Irish, indian, Chinese	3	Skin appearance and family history		3	1	little manual dexterity	1	Depression diagnosed in late teens recurring intermittently throughout adult life.
21	53	USA	1	Caucasian	3	Skin appearance and family history		3	1	Artistic	1	Bipolar 2, long depressive episodes with infrequent short periods of normality. ADHD, difficulty with maintaining focus
22	33	Canada	2	caucasian	3	Skin appearance and family history		3	1	cannot whistle or snap fingers	1	depression/anxiety disorder. diagnosed at age 33 by doctor.
23	43	Usa	1	Asian	3	Skin appearance and family history		4	2		2
24	61	usa	1	-	3	Skin appearance and family history		4	2		2
25	37	United States	1	Caucasian	2	Skin appearance and family history		2	2		2
26	49	Uk	1	C of e	2	Skin appearance and family history		2	2		1	At 13yrs sent to private boarding school for children with learning disabilities
27	28	Norway	1	Norway	2	Skin appearance and family history		2	1		2
28	32	usa	1	white	3	Skin appearance and family history		1	2		2
29	46	usa	2	english/greek	2	Skin appearance and family history		2	1		2
30	37	29 yrs in uk now live in usa	1	white	3	Skin appearance and family history		3	2		2
31	19	india	1	-	2	Skin appearance and family history		3	1	Drawing	1	Migraine,15
32	71	UK	1	White Anglo Saxon	2	Skin appearance and family history		1	1	Peripheral Arterial Disease, Osteaarthritis, Fast Atrial Fibrillation, lower back problems	2
33	64	UK	1	White British	3	Skin appearance and family history		-	-		-
34	20	uk	2	white british	2	Don't know		2	2		2
35	30	England	1	White british	1	Skin appearance and family history		2	2		2
36	36	USA	1	Caucasian	3	Skin appearance and family history		2	2		2
37	63	England UK	1	White (Irish)	3	Skin appearance and family history		1	2		2
38	45	US	1	white	2	Skin appearance and family history		4	2		-
39	37	usa	1	Arab	2	Skin appearance and family history		3	2		2
40	24	Philippines	1	Asian	3	Skin appearance and family history		1	1		2
41	21	USA	3	Caucasian	2	Skin appearance and family history		3	1	Specific learning disability in written comprehension and math problem solving	1	Age 8 diagnosed with everything from adhd to borderline schizophrenia and finally came to the conclusion they really didn't know what was wrong and no medications seemed to help. Depressed manner, shy, withdrawn, and at times shows signs of adhd. Has fits of rage and is very impulsive.	parent report but adult
42	24	England	1	English white	2	Skin appearance, family history and genetic test	2	2	1	Autism	1	Autism aged 12 learning difficulties aged 6	parent report but adult
43	53	England	1	English/Germanic	3	Skin appearance and family history		3	1	Artist	1	The nearest it has been described as is along the spectrum of dyspraxia to aspergers. I have difficulty concentrating in a crowded environment. My coordination is too poor to drive or ride a bike or catch moving objects. My brain will stop decoding my surroundings if I get very stressed. I have suffered badly from nervous problems and panic attacks. I cannot take instructions well as I cannot rem…
44	20	Britain	1	English	3	Skin appearance, family history and genetic test	4	3	1	Good with putting words together for lyrics	2
45	21	England	1	White British	3	Skin appearance and family history		3	2		2
46	56	England	1	European	3	Skin appearance, family history and genetic test	4	2	2		1	Severe depression and Anxiety. Also I have had two EEG'S which have been abnormal, but no reason given. My depression and Anxiety have been present much of my life in some shape or form, but depression has got worse with age.
47	46	United Kingdom	3	White	2	Skin appearance and family history		2	2		1	Depression
48	53	England	1	White British	4	Don't know		3	2		2
49	23	US	1	Caucasian	3	Skin appearance and family history		3	2		2
50	55	Uk	1	Western	3	Skin appearance and family history		-	-		-
51	29	Canada	3	Caucasian	3	Skin appearance and family history		2	1	Artistic	2
52	55	UK	1	white English	3	Skin appearance and family history		1	1	degenerant disc arthuritis	2
53	24	canada	1	white	3	Skin appearance and family history		3	2		2
54	46	China	1	Chinese	3	Skin appearance and family history		3	2		2
55	40	Uk	2	White British	2	Skin appearance and family history		3	2		2
56	39	uk	1	WHITE	3	Skin appearance and family history		2	2		1	Dyslexia, age 12 / Asperger's, age 35
57	36	Uk	1	British	2	Skin appearance and family history		2	2		2
58	54	US	1	German	2	Skin appearance and family history		1	1		1	Bipolar at 35

## Sheet: Sensory information
	Q12_1	Q12_2	Q12_3	Q12_4	Q12_5
Participant number	How would you rate your vision? 1=excellent, 2=good, 3=average, 4=poor, 5=very poor	How would you rate your hearing? 1=excellent, 2=good, 3=average, 4=poor, 5=very poor	How would you rate your sense of taste? 1=excellent, 2=good, 3=average, 4=poor, 5=very poor	How would you rate your sense of smell? 1=excellent, 2=good, 3=average, 4=poor, 5=very poor	How would you rate your sense of touch? 1=excellent, 2=good, 3=average, 4=poor, 5=very poor
1	1	4	5	5	3
2	3	4	3	3	3
3	1	3	4	4	2
4	4	2	3	2	3
5	2	2	2	3	2
6	1	1	1	1	1
7	3	4	2	3	2
8	3	4	4	5	2
9	1	2	1	1	2
10	1	1	2	4	1
11	3	3	2	2	2
12	1	1	1	1	1
59	1	1	1	1	1
13	1	1	2	1	1
14	5	3	2	2	1
15	1	1	1	1	1
16	1	1	1	2	1
17	4	2	2	2	2
18	1	4	4	5	1
19	3	5	3	3	3
20	2	2	1	2	5
21	4	1	2	4	3
22	4	1	2	2	2
23	4	1	2	3	4
24	3	2	2	2	2
25	2	2	2	3	3
26	4	2	2	2	2
27	1	3	3	3	4
28	2	2	2	2	2
29	4	2	2	3	3
30	1	1	1	1	1
31	3	2	1	1	1
32	2	4	2	3	2
34	2	2	2	2	2
35	4	1	1	2	2
36	1	2	2	2	1
37	1	1	1	1	1
38	3	2	2	2	2
39	4	5	3	2	2
40	3	3	1	2	1
41	4	1	1	1	1
42	3	3	3	4	4
43	2	1	2	2	1
44	1	3	1	1	1
45	1	1	1	1	1
46	4	4	4	3	3
47	2	2	2	2	2
48	3	2	2	2	2
49	4	2	2	2	2
51	3	2	1	1	2
52	4	3	2	2	3
53	1	1	1	1	1
54	2	2	2	2	2
55	3	3	3	2	2
56	1	2	2	2	3
57	2	2	3	2	2
58	3	3	2	2	2
Median	2	2	2	2	2
Wilcoxon Signed Ranks Test p-value	p<0.001	p<0.001	p<0.001	p<0.001	p<0.001
(vs. average value of '3')
	1/57 very poor	2/57 very poor	1/57 very poor	3/57 very poor	1/57 very poor

## Sheet: Adult ADHD Self Report Scale
	Q18_1	Q18_2	Q18_3	Q18_4	Q18_5	Q18_6	Q18_7	Q18_8	Q18_9	Q18_10	Q18_11	Q18_12	Q18_13	Q18_14	Q18_15	Q18_16	Q18_17	Q18_18
	Attention and impulsivity 1: Please answer the questions below, rating yourself on each of the cr...-1. How often do you have trouble wrapping up the final details of a project, once the challenging parts have been done?	Attention and impulsivity 1: Please answer the questions below, rating yourself on each of the cr...-2. How often do you have difficulty getting things in order when you have to do a task that requires organization?	Attention and impulsivity 1: Please answer the questions below, rating yourself on each of the cr...-3. How often do you have problems remembering appointments or obligations?	Attention and impulsivity 1: Please answer the questions below, rating yourself on each of the cr...-4. When you have a task that requires a lot of thought, how often do you avoid or delay getting started?	Attention and impulsivity 1: Please answer the questions below, rating yourself on each of the cr...-5. How often do you fidget or squirm with your hands or feet when you have to sit down for a long time?	Attention and impulsivity 1: Please answer the questions below, rating yourself on each of the cr...-6. How often do you feel overly active and compelled to do things, like you were driven by a motor?	Attention and impulsivity 1: Please answer the questions below, rating yourself on each of the cr...-7. How often do you make careless mistakes when you have to work on a boring or difficult project?	Attention and impulsivity 1: Please answer the questions below, rating yourself on each of the cr...-8. How often do you have difficulty keeping your attention when you are doing boring or repetitive work?	Attention and impulsivity 1: Please answer the questions below, rating yourself on each of the cr...-9. How often do you have difficulty concentrating on what people say to you, even when they are speaking to you directly?	Attention and impulsivity 1: Please answer the questions below, rating yourself on each of the cr...-10. How often do you misplace or have difficulty finding things at home or at work?	Attention and impulsivity 1: Please answer the questions below, rating yourself on each of the cr...-11. How often are you distracted by activity or noise around you?	Attention and impulsivity 1: Please answer the questions below, rating yourself on each of the cr...-12. How often do you leave your seat in meetings or other situations in which you are expected to remain seated?	Attention and impulsivity 1: Please answer the questions below, rating yourself on each of the cr...-13. How often do you feel restless or fidgety?	Attention and impulsivity 1: Please answer the questions below, rating yourself on each of the cr...-14. How often do you have difficulty unwinding and relaxing when you have time to yourself?	Attention and impulsivity 1: Please answer the questions below, rating yourself on each of the cr...-15. How often do you find yourself talking too much when you are in social situations?	Attention and impulsivity 1: Please answer the questions below, rating yourself on each of the cr...-16. When you are in a conversation, how often do you find yourself finishing the sentences of the people you are talking to, before they can finish the sentence themselves?	Attention and impulsivity 1: Please answer the questions below, rating yourself on each of the cr...-17. How often do you have difficulty waiting your turn in situations when turn taking is required?	Attention and impulsivity 1: Please answer the questions below, rating yourself on each of the cr...-18. How often do you interrupt others when they are busy?
Participant number	SCORE: 0=never, 1=rarely, 2=sometimes, 3=often, 4=very often								Count symptom											Total score Section A	Inattention score A	Hyp-Imp score A	Total score Section B	Inattention score B	Hyp-Imp score B	Total score A+B	Inattention score A+B	Hyp-Imp score A+B	Symptom count A (max. 6)	Possible ADHD?	Symptom count B (max. 12)	Total symptom count A+B (max. 18)	Inattentive symptom count A+B (max. 9)	Hyperactive-impulsive symptom count A+B (max. 9)
	Red	Imputed values
1	4	4	4	4	1	2	2	4	4	2	2	1	1	0	1	0	0	0		19	16	3	17	14	3	36	30	6	4	Yes	2	6	6	0
2	3	3	3	3	3	0	1	2.5625	3	3	3	1	1	3	1	4	1	1		15	12	3	24.5625	12.5625	12	39.5625	24.5625	15	5	Yes	6	11	8	3
3	2	1	1	1	4	1	2	2	4	1	1	1	1	1	1	1	1	1		10	5	5	17	10	7	27	15	12	2		1	3	2	1
4	2	2	1	3	3	1	2	3	2	1	2	2	3	3	1	3	1	2		12	8	4	25	10	15	37	18	19	4	Yes	7	11	5	6
5	3	4	3	3	4	3	3	2	4	4	1	0	2	2	1	0	1	0		20	13	7	20	14	6	40	27	13	6	Yes	3	9	7	2
6	1	1	2	1	2	2	3	2	1	2	3	1	2	2	1	3	0	1		9	5	4	21	11	10	30	16	14	1		3	4	3	1
7	2	2	2	4	1	3	1	1	3	3	3	1	2	2	1	1	2	1		14	10	4	21	11	10	35	21	14	5	Yes	3	8	7	1
8	2	2	1	2	2	0	1	1	0	2	3	1	2	2	1	2	1	1		9	7	2	17	7	10	26	14	12	2		2	4	3	1
9	2.08333	1	2	2.35417	2	4	4	4	3	4	2.3617	1	4	4	4	3	0	4		13.4375	7.4375	6	37.3617	17.3617	20	50.7992	24.7992	26	3		9	12	6	6
10	1	0	2	2	3	2	0	2	0	0	2	1	2	1	1	1	0	2		10	5	5	12	4	8	22	9	13	2		1	3	1	2
13	2	1	1	3	3	3	1	2	2	3	2	3	3	3	1	1	1	1		13	7	6	23	10	13	36	17	19	4	Yes	5	9	4	5
14	2	3	4	4	4	2	2	4	4	4	2	1	2	3	4	2	2	2		19	13	6	32	16	16	51	29	22	5	Yes	7	12	7	5
15	2	1	1	2	4	4	2	4	4	2	2	4	4	4	2	4	4	2		14	6	8	38	14	24	52	20	32	3		8	11	3	8
16	1	1	1	2	1	1	1	1	1	2.29167	2.3617	1	1	2	1	1	2	1		7	5	2	16.6534	7.65337	9	23.6534	12.6534	11	0		0	0	0	0
17	2	1	3	3	4	2	1	3	4	2	2	2	3	4	4	3	2	2		15	9	6	32	12	20	47	21	26	4	Yes	8	12	5	7
18	2	2	3	2	1	1	1	2	4	1	2	1	2	1	1	0	0	1		11	9	2	16	10	6	27	19	8	3		1	4	4	0
19	1	2	3	3	3	3	2	2	3	4	2	1	2	2	4	1	2	2		15	9	6	27	13	14	42	22	20	5	Yes	4	9	5	4
20	4	4	3	4	1	1	2	2	2	3	2	1	1	1	2	1	0	1		17	15	2	18	11	7	35	26	9	4	Yes	2	6	6	0
21	4	4	0	2	4	0	3	4	3	3	3	1	3	3	0	3	1	3		14	10	4	30	16	14	44	26	18	3		9	12	7	5
22	1	1	1	1	1	1	1	1	1	1	1	1	2	2	1	0	1	1		6	4	2	13	5	8	19	9	10	0		0	0	0	0
23	1	1	1	0	1	1	2	1	1	1	1	1	1	1	2	1	1	1		5	3	2	14	6	8	19	9	10	0		0	0	0	0
25	3	3	2	3	1	3	3	3	2	3	4	1	1	1	2	3	1	1		15	11	4	25	15	10	40	26	14	5	Yes	6	11	9	2
26	2	2	3	3	3	1	3	3	3	2	3	1	3	0	3	2	2	2		14	10	4	27	14	13	41	24	17	5	Yes	8	13	8	5
28	2	2	1	2	3	1	3	3	3	3	3	1	2	2	3	2	2	2		11	7	4	29	15	14	40	22	18	3		8	11	7	4
29	2	2	2	2	3	2	2	3	2	1	2	1	3	3	3	2	2	2		13	8	5	26	10	16	39	18	21	4	Yes	6	10	5	5
30	2	1	1	2	3	3	1	1	0	0	1	0	2	1	2	0	0	0		12	6	6	8	3	5	20	9	11	3		0	3	1	2
31	1	1	2	2	3	2	2	3	4	3	4	1	0	4	2	3	0	4		11	6	5	30	16	14	41	22	19	2		7	9	5	4
32	2	1	3	2	3	1	1	2	2	3	1	1	2	1	1	2	1	1		12	8	4	18	9	9	30	17	13	3		2	5	4	1
35	1	1	4	4	4	3	3	4	4	4	3	3	3	3	3	3	3	3		17	10	7	39	18	21	56	28	28	4	Yes	12	16	7	9
37	1	1	1	2	1	1	1	1	1	1	2	1	1	1	2	2	2	2		7	5	2	17	6	11	24	11	13	0		2	2	0	2
38	1	1	2	2	1	1	2	1	1	2	1	1	1	1	1	1	1	1		8	6	2	14	7	7	22	13	9	1		0	1	1	0
39	1	1	0	2	1	1	1	3	4	1	1	3	3	1	0	0	1	0		6	4	2	18	10	8	24	14	10	0		4	4	2	2
40	2	1	1	1	2	2	1	1	0	1	3	2	2	2	2	1	2	2		9	5	4	19	6	13	28	11	17	1		3	4	2	2
41	4	4	4	4	4	4	4	4	4	4	4	4	4	4	1	1	4	2		24	16	8	40	20	20	64	36	28	6	Yes	10	16	9	7
42	4	4	4	4	2	1	3	4	4	4	4	4	1	4	1	1	1	1		19	16	3	32	19	13	51	35	16	4	Yes	7	11	9	2
43	4	4	2	3	2	3	3	4	3	3	4	1	2	2	1	1	1	1		18	13	5	26	17	9	44	30	14	5	Yes	5	10	9	1
44	3	2	2	2	2	4	1	3	3	4	4	3	2	3	1	3	1	1		15	9	6	29	15	14	44	24	20	4	Yes	7	11	7	4
45	1	1	1	1	4	3	2	1	1	1	2	1	4	1	0	1	1	1		11	4	7	16	7	9	27	11	16	2		1	3	0	3
46	2	2	1	4	3	4	2	3	3	2	3	4	4	4	1	2	3	2		16	9	7	33	13	20	49	22	27	5	Yes	9	14	5	8
47	2	2	3	1	3	4	3	3	3	3	3	1	3	4	3	3	1	2		15	8	7	32	15	17	47	23	24	5	Yes	10	15	8	7
48	2	1	1	3	1	2	2	4	2	3	3	0	1	1	1	3	3	3		10	7	3	26	14	12	36	21	15	2		7	9	6	3
51	1	2	1	2	4	1	3	3	2	1	1	1	4	3	1	3	2	3		11	6	5	27	10	17	38	16	22	2		7	9	4	5
52	3	3	3	3	3	3	3	3	3	3	3	3	4	4	4	3	4	4		18	12	6	41	15	26	59	27	32	6	Yes	12	18	9	9
53	1	1	2	2	4	0	2	4	3	1	0	0	1	0	1	1	0	0		10	6	4	13	10	3	23	16	7	2		2	4	3	1
54	1	1	1	1	1	1	1	1	2	1	1	1	2	1	1	1	1	1		6	4	2	14	6	8	20	10	10	0		1	1	1	0
55	1	1	0	3	3	1	2	3	1	2	4	1	4	2	0	0	0	1		9	5	4	20	12	8	29	17	12	2		3	5	3	2
56	4	4	4	1	4	3	4	3	4	4	4	2	3	4	4	2	0	4		20	13	7	38	19	19	58	32	26	5	Yes	11	16	8	8
57	2	2	1	1	3	1	2	2	1	2	2	1	4	4	1	0	0	2		10	6	4	21	9	12	31	15	16	3		3	6	2	4
58	3	2	2	2	2	2	2	3	2	2	2	2	2	2	1	1	1	1		13	9	4	21	11	10	34	20	14	3		3	6	5	1
																				Total Section A	Inattention A	Hyp-Imp A	Total Section B	Inattention B	Hyp-Imp B	Total A+B	Inattention A+B	Hyp-Imp A+B	Symptom count A	Possible ADHD?	Symptom count B (max. 12)	Total symptom count A+B (max. 18)	Inattentive symptom count A+B (max. 9)	Hyperactive-impulsive symptom count A+B (max. 9)
																			Mean	12.8048	8.31505	4.4898	23.8893	11.6853	12.2041	36.6942	20.0003	16.6939	3.10204		4.83673	7.93878	4.65306	3.26531
49																			SE	0.613179	0.498063	0.257741	1.19562	0.60049	0.757603	1.66401	1.01348	0.93823	0.25295	22/49 (45%)	0.499444	0.683508	0.40778	0.386612

## Sheet: BIS-11
		Q21_1	Q21_2	Q21_3	Q21_4	Q21_5	Q21_6	Q21_7	Q21_8	Q21_9	Q21_10	Q21_11	Q21_12	Q21_13	Q21_14	Q21_15	Q21_16	Q21_17	Q21_18	Q21_19	Q21_20	Q21_21	Q21_22	Q21_23	Q21_24	Q21_25	Q21_26	Q21_27	Q21_28	Q21_29	Q21_30
Participant number	Status	Attention and impulsivity 2: People differ in the ways they act and think in different situations...-1. I plan tasks carefully	Attention and impulsivity 2: People differ in the ways they act and think in different situations...-2. I do things without thinking	Attention and impulsivity 2: People differ in the ways they act and think in different situations...-3. I make-up my mind quickly	Attention and impulsivity 2: People differ in the ways they act and think in different situations...-4. I am happy-go-lucky	Attention and impulsivity 2: People differ in the ways they act and think in different situations...-5. I donâ€™t â€œpay attention.â€	Attention and impulsivity 2: People differ in the ways they act and think in different situations...-6. I have â€œracingâ€ thoughts.	Attention and impulsivity 2: People differ in the ways they act and think in different situations...-7. I plan trips well ahead of time.	Attention and impulsivity 2: People differ in the ways they act and think in different situations...-8. I am self controlled.	Attention and impulsivity 2: People differ in the ways they act and think in different situations...-9. I concentrate easily.	Attention and impulsivity 2: People differ in the ways they act and think in different situations...-10. I save regularly	Attention and impulsivity 2: People differ in the ways they act and think in different situations...-11. I â€œsquirmâ€ at plays or lectures.	Attention and impulsivity 2: People differ in the ways they act and think in different situations...-12. I am a careful thinker.	Attention and impulsivity 2: People differ in the ways they act and think in different situations...-13. I plan for job security.	Attention and impulsivity 2: People differ in the ways they act and think in different situations...-14. I say things without thinking	Attention and impulsivity 2: People differ in the ways they act and think in different situations...-15. I like to think about complex problems.	Attention and impulsivity 2: People differ in the ways they act and think in different situations...-16. I change jobs.	Attention and impulsivity 2: People differ in the ways they act and think in different situations...-17. I act â€œon impulse.â€	Attention and impulsivity 2: People differ in the ways they act and think in different situations...-18. I get easily bored when solving thought problems.	Attention and impulsivity 2: People differ in the ways they act and think in different situations...-19. I act on the spur of the moment.	Attention and impulsivity 2: People differ in the ways they act and think in different situations...-20. I am a steady thinker.	Attention and impulsivity 2: People differ in the ways they act and think in different situations...-21. I change residences.	Attention and impulsivity 2: People differ in the ways they act and think in different situations...-22. I buy things on impulse.	Attention and impulsivity 2: People differ in the ways they act and think in different situations...-23. I can only think about one thing at a time.	Attention and impulsivity 2: People differ in the ways they act and think in different situations...-24. I change hobbies.	Attention and impulsivity 2: People differ in the ways they act and think in different situations...-25. I spend or charge more than I earn.	Attention and impulsivity 2: People differ in the ways they act and think in different situations...-26. I often have extraneous thoughts when thinking.	Attention and impulsivity 2: People differ in the ways they act and think in different situations...-27. I am more interested in the present than the future.	Attention and impulsivity 2: People differ in the ways they act and think in different situations...-28. I am restless at the theater or lectures.	Attention and impulsivity 2: People differ in the ways they act and think in different situations...-29. I like puzzles.	Attention and impulsivity 2: People differ in the ways they act and think in different situations...-30. I am future oriented.
		1=rarely/never, 2=occasionally, 3=often, 4=almost always/always																																2nd order factors			1st order factors
		Reverse scored		Red=imputed values				Reverse scored	Reverse scored	Reverse scored	Reverse scored		Reverse scored	Reverse scored		Reverse scored					Reverse scored									Reverse scored	Reverse scored		Total score	Attentional	Motor	Non-planning	Attention	Cognitive instability	Motor	Perseverance	Self control	Cognitive complexity
1	RESPONSE	1	3	3	4	4	3	1	3	2	1	1	4	3	2	4	1	2	1	3	4	1	1	4	2	1	3	2	1	4	4
	SCORE	4	3	3	4	4	3	4	2	3	4	1	1	2	2	1	1	2	1	3	1	1	1	4	2	1	3	2	1	1	1		66	18	24	24	10	8	17	7	15	9
2	RESPONSE	3	3	3	2	3	4	1	3	2	4	2	3	2	missing	3	3	3	1	3	3	3	1	2	missing	1	3	1	1	4	3
	SCORE	2	3	3	2	3	4	4	2	3	1	2	2	3	2.54348	2	3	3	1	3	2	3	1	2	1.8125	1	3	1	1	1	2		68	19.8125	26	21.5435	11	8.8125	16	10	15.5435	6
3	RESPONSE	3	1	2	3	2	1	1	2	missing	missing	1	3	1	1	1	1	1	2	1	2	1	2	1	1	1	1	2	2	2	1
	SCORE	2	1	2	3	2	1	4	3	2.58696	2.71739	1	2	4	1	4	1	1	2	1	3	1	2	1	1	1	1	2	2	3	4		62	13.587	18	29.7174	10.587	3	11	7	16	13.7174
4	RESPONSE	2	3	3	2	1	1	2	4	2	2	2	2	4	2	2	1	2	3	2	2	1	3	3	1	2	2	1	2	3	3
	SCORE	3	3	3	2	1	1	3	1	3	3	2	3	1	2	3	1	2	3	2	3	1	3	3	1	2	2	1	2	2	2		64	15	24	25	11	4	17	7	13	12
5	RESPONSE	3	1	4	3	1	4	2	4	4	1	2	1	1	1	1	3	3	1	3	1	1	3	1	2	4	3	3	4	1	2
	SCORE	2	1	4	3	1	4	3	1	1	4	2	4	4	1	4	3	3	1	3	4	1	3	1	2	4	3	3	4	4	3		81	21	29	31	12	9	21	8	15	16
6	RESPONSE	3	2	2	1	2	1	2	4	3	3	1	3	3	2	3	2	2	3	2	3	3	2	2	2	2	2	2	3	3	2
	SCORE	2	2	2	1	2	1	3	1	2	2	1	2	2	2	2	2	2	3	2	2	3	2	2	2	2	2	2	3	2	3		61	15	23	23	10	5	13	10	12	11
7	RESPONSE	2	2	3	2	3	2	1	2	1	2	2	2	1	1	1	1	3	2	3	1	2	3	4	2	3	1	1	1	2	1
	SCORE	3	2	3	2	3	2	4	3	4	3	2	3	4	1	4	1	3	2	3	4	2	3	4	2	3	1	1	1	3	4		80	19	30	31	14	5	19	11	18	13
8	RESPONSE	2	1	1	missing	2	2	2	3	3	2	3	2	3	1	3	1	2	2	2	missing	2	1	4	1	1	3	3	1	2	2
	SCORE	3	1	1	2.15217	2	2	3	2	2	3	3	3	2	1	2	1	2	2	2	2.58696	2	1	4	1	1	3	3	1	3	3		63.7391	16.587	20.1522	27	10.587	6	10.1522	10	14	13
9	RESPONSE	2	4	3	1	4	4	1	3	1	1	1	1	1	4	4	1	3	4	1	1	1	3	1	1	1	3	3	1	4	2
	SCORE	3	4	3	1	4	4	4	2	4	4	1	4	4	4	1	1	3	4	1	4	1	3	1	1	1	3	3	1	1	3		78	22	22	34	14	8	16	6	21	13
10	RESPONSE	3	1	2	1	1	3	2	4	2	4	1	3	4	2	3	3	3	2	3	3	2	2	2	2	2	3	2	1	3	3
	SCORE	2	1	2	1	1	3	3	1	3	1	1	2	1	2	2	3	3	2	3	2	2	2	2	2	2	3	2	1	2	2		59	16	23	20	8	8	14	9	11	9
13	RESPONSE	4	1	2	2	1	4	3	3	2	3	3	4	3	1	4	1	1	1	2	3	1	2	1	1	1	3	3	2	4	4
	SCORE	1	1	2	2	1	4	2	2	3	2	3	1	2	1	1	1	1	1	2	2	1	2	1	1	1	3	3	2	1	1		51	19	15	17	11	8	11	4	9	8
14	RESPONSE	3	2	2	2	4	3	1	4	1	1	4	1	3	2	1	1	3	3	2	2	3	4	3	3	1	3	3	4	3	2
	SCORE	2	2	2	2	4	3	4	1	4	4	4	4	2	2	4	1	3	3	2	3	3	4	3	3	1	3	3	4	2	3		85	28	26	31	19	9	16	10	15	16
15	RESPONSE	4	3	4	4	2	4	4	4	4	4	2	4	4	4	4	4	2	4	2	3	4	3	1	4	1	4	2	1	1	4
	SCORE	1	3	4	4	2	4	1	1	1	1	2	1	1	4	1	4	2	4	2	2	4	3	1	4	1	4	2	1	4	1		70	20	29	21	8	12	19	10	9	12
16	RESPONSE	4	1	2	2	1	1	4	4	3	3	1	4	4	1	4	1	1	4	1	4	1	2	2	2	1	2	2	1	3	3
	SCORE	1	1	2	2	1	1	1	1	2	2	1	1	1	1	1	1	1	4	1	1	1	2	2	2	1	2	2	1	2	2		44	11	16	17	6	5	10	6	6	11
17	RESPONSE	2	1	3	4	3	4	3	4	2	1	4	2	1	4	1	1	2	3	3	3	1	2	4	1	2	4	2	3	1	1
	SCORE	3	1	3	4	3	4	2	1	3	4	4	3	4	4	4	1	2	3	3	2	1	2	4	1	2	4	2	3	4	4		85	24	27	34	15	9	17	10	17	17
18	RESPONSE	2	2	1	2	2	2	3	3	3	4	1	3	3	4	3	1	1	1	2	3	1	2	4	2	3	2	2	1	4	3
	SCORE	3	2	1	2	2	2	2	2	2	1	1	2	2	4	2	1	1	1	2	2	1	2	4	2	3	2	2	1	1	2		57	14	21	22	8	6	13	8	15	7
19	RESPONSE	3	2	1	2	3	4	2	2	2	3	3	3	1	missing	1	4	3	3	3	2	3	missing	3	4	4	3	4	2	2	1
	SCORE	2	2	1	2	3	4	3	3	3	2	3	2	4	2.02222	4	4	3	3	3	3	3	2.19565	3	4	4	3	4	2	3	4		88.2179	25	31.1957	32.0222	14	11	17.1957	14	16.0222	16
20	RESPONSE	3	2	2	2	3	2	1	3	2	1	1	3	3	2	2	1	2	2	2	2	1	3	3	1	2	3	3	3	3	2
	SCORE	2	2	2	2	3	2	4	2	3	4	1	2	2	2	3	1	2	2	2	3	1	3	3	1	2	3	3	3	2	3		70	19	23	28	13	6	15	8	14	14
21	RESPONSE	1	3	1	1	2	3	1	2	2	1	4	2	2	3	4	1	3	4	3	2	1	3	3	4	1	3	4	4	3	1
	SCORE	4	3	1	1	2	3	4	3	3	4	4	3	3	3	1	1	3	4	3	3	1	3	3	4	1	3	4	4	2	4		85	26	24	35	16	10	15	9	20	15
22	RESPONSE	4	1	2	2	1	2	4	4	4	1	1	4	4	1	4	1	1	1	1	4	1	1	1	1	1	1	1	1	4	4
	SCORE	1	1	2	2	1	2	1	1	1	4	1	1	1	1	1	1	1	1	1	1	1	1	1	1	1	1	1	1	1	1		36	9	13	14	5	4	9	4	6	8
23	RESPONSE	4	2	3	3	2	2	3	3	3	3	2	3	3	2	3	2	2	1	2	3	2	1	1	1	1	1	2	2	3	3
	SCORE	1	2	3	3	2	2	2	2	2	2	2	2	2	2	2	2	2	1	2	2	2	1	1	1	1	1	2	2	2	2		55	14	21	20	10	4	14	7	11	9
25	RESPONSE	2	3	3	1	2	2	3	4	3	2	1	3	3	1	2	1	1	3	2	2	1	2	4	2	1	3	2	1	3	2
	SCORE	3	3	3	1	2	2	2	1	2	3	1	2	2	1	3	1	1	3	2	3	1	2	4	2	1	3	2	1	2	3		62	16	22	24	9	7	13	9	11	13
26	RESPONSE	4	2	3	3	2	2	3	1	2	1	1	2	3	3	1	1	1	2	3	2	2	2	2	1	2	4	4	4	1	2
	SCORE	1	2	3	3	2	2	2	4	3	4	1	3	2	3	4	1	1	2	3	3	2	2	2	1	2	4	4	4	4	3		77	20	24	33	13	7	16	8	15	18
29	RESPONSE	2	2	2	2	2	2	1	2	2	1	2	1	1	2	1	2	2	2	2	2	1	2	1	2	2	2	2	2	1	1
	SCORE	3	2	2	2	2	2	4	3	3	4	2	4	4	2	4	2	2	2	2	3	1	2	1	2	2	2	2	2	4	4		76	18	22	36	12	6	14	8	20	16
30	RESPONSE	3	1	1	2	1	1	3	3	3	4	2	4	4	1	3	1	1	1	1	3	1	1	2	1	1	2	2	1	2	2
	SCORE	2	1	1	2	1	1	2	2	2	3	2	1	1	1	2	1	1	1	1	2	1	1	2	1	1	2	2	1	3	3		47	12	15	20	8	4	8	7	9	11
31	RESPONSE	4	1	4	4	1	3	1	3	4	4	3	4	4	4	4	1	4	2	2	4	3	2	3	3	1	4	2	4	4	4
	SCORE	1	1	4	4	1	3	4	2	1	1	3	1	1	4	1	1	4	2	2	1	3	2	3	3	1	4	2	4	1	1		66	20	26	20	10	10	18	8	13	7
32	RESPONSE	4	2	3	2	1	2	4	4	4	4	2	4	4	1	3	1	2	2	1	1	2	1	3	1	1	2	2	1	1	1
	SCORE	1	2	3	2	1	2	1	1	1	1	2	1	1	1	2	1	2	2	1	4	2	1	3	1	1	2	2	1	4	4		53	14	22	17	9	5	12	10	6	11
35	RESPONSE	1	4	3	2	4	3	1	3	1	2	4	1	1	1	1	2	3	4	3	1	2	4	3	2	1	2	4	4	1	1
	SCORE	4	4	3	2	4	3	4	2	4	3	4	4	4	1	4	2	3	4	3	4	2	4	3	2	1	2	4	4	4	4		96	27	31	38	20	7	20	11	19	19
37	RESPONSE	3	2	2	3	2	2	1	3	3	2	1	4	3	1	3	1	1	1	1	4	1	2	3	2	2	1	2	1	1	2
	SCORE	2	2	2	3	2	2	4	2	2	3	1	1	2	1	2	1	1	1	1	1	1	2	3	2	2	1	2	1	4	3		57	12	21	24	7	5	13	8	12	12
38	RESPONSE	1	2	2	3	2	2	1	3	3	1	2	2	1	2	1	1	1	2	2	2	2	2	3	1	3	2	2	1	1	1
	SCORE	4	2	2	3	2	2	4	2	2	4	2	3	4	2	4	1	1	2	2	3	2	2	3	1	3	2	2	1	4	4		75	15	25	35	10	5	15	10	19	16
39	RESPONSE	3	1	4	1	3	3	3	3	2	3	2	2	3	2	1	2	1	2	2	2	3	1	2	1	1	1	1	1	1	2
	SCORE	2	1	4	1	3	3	2	2	3	2	2	3	2	2	4	2	1	2	2	3	3	1	2	1	1	1	1	1	4	3		64	17	21	26	12	5	11	10	13	13
41	RESPONSE	1	1	4	1	4	4	1	1	1	1	4	1	1	4	1	4	4	4	4	1	3	4	3	3	4	4	4	3	1	1
	SCORE	4	1	4	1	4	4	4	4	4	4	4	4	4	4	4	4	4	4	4	4	3	4	3	3	4	4	4	3	4	4		110	30	36	44	19	11	22	14	24	20
42	RESPONSE	1	2	1	1	4	1	1	1	1	1	1	2	1	1	3	1	1	1	1	2	1	1	4	1	1	1	4	1	3	1
	SCORE	4	2	1	1	4	1	4	4	4	4	1	3	4	1	2	1	1	1	1	3	1	1	4	1	1	1	4	1	2	4		67	16	18	33	13	3	8	10	20	13
43	RESPONSE	3	1	2	1	1	4	3	4	2	2	1	4	2	1	4	1	2	1	2	3	1	2	3	1	2	4	1	1	missing	2
	SCORE	2	1	2	1	1	4	2	1	3	3	1	1	3	1	1	1	2	1	2	2	1	2	3	1	2	4	1	1	2.72973	3		55.7297	17	20	18.7297	8	9	12	8	10	8.72973
44	RESPONSE	2	2	2	3	2	3	2	3	3	2	2	4	1	2	4	1	2	3	2	2	2	3	1	1	4	3	2	1	3	3
	SCORE	3	2	2	3	2	3	3	2	2	3	2	1	4	2	1	1	2	3	2	3	2	3	1	1	4	3	2	1	2	2		67	17	24	26	10	7	18	6	15	11
45	RESPONSE	3	1	3	2	4	4	3	4	4	4	3	4	3	2	4	2	3	1	3	4	1	2	1	1	1	4	1	3	4	4
	SCORE	2	1	3	2	4	4	2	1	1	1	3	1	2	2	4	2	3	1	3	1	1	2	1	1	1	4	1	3	1	1		59	21	20	18	12	9	15	5	10	8
46	RESPONSE	4	2	3	1	2	4	4	4	2	2	4	4	3	3	2	1	3	2	3	1	1	3	4	1	2	4	2	4	2	3
	SCORE	1	2	3	1	2	4	1	1	3	3	4	1	2	3	3	1	3	2	3	4	1	3	4	1	2	4	2	4	3	2		73	26	25	22	17	9	17	8	9	13
47	RESPONSE	4	2	1	2	2	4	4	3	2	4	3	4	4	2	2	1	2	4	2	3	1	1	2	3	1	2	2	4	1	2
	SCORE	1	2	1	2	2	4	1	2	3	1	3	1	1	2	3	1	2	4	2	2	1	1	2	3	1	2	2	4	4	3		63	23	18	22	14	9	11	7	8	14
48	RESPONSE	2	1	4	1	3	2	3	3	2	1	1	2	3	1	2	1	1	3	2	2	1	3	3	3	1	2	3	3	2	2
	SCORE	3	1	4	1	3	2	2	2	3	4	1	3	2	1	3	1	1	3	2	3	1	3	3	3	1	2	3	3	3	3		70	20	21	29	13	7	13	8	13	16
51	RESPONSE	3	2	2	2	1	4	2	2	2	1	3	3	2	4	4	1	3	2	2	2	2	3	3	3	2	4	2	3	3	3
	SCORE	2	2	2	2	1	4	3	3	3	4	3	2	3	4	1	1	3	2	2	3	2	3	3	3	2	4	2	3	2	2		76	24	24	28	13	11	16	8	17	11
52	RESPONSE	2	4	4	4	3	4	2	2	1	4	2	1	2	4	1	1	3	4	3	1	1	2	1	2	2	3	2	4	1	1
	SCORE	3	4	4	4	3	4	3	3	4	1	3	4	3	4	4	1	3	4	3	4	1	2	1	2	2	3	2	4	4	4		91	27	29	35	18	9	22	7	20	15
53	RESPONSE	2	3	4	3	4	1	4	4	4	4	3	4	4	2	4	3	4	2	2	4	3	2	1	1	2	2	3	1	4	3
	SCORE	3	3	4	3	4	1	1	1	1	1	3	1	1	2	1	3	4	2	2	1	3	2	1	1	2	2	3	1	1	2		60	14	29	17	10	4	20	9	9	8
54	RESPONSE	3	2	3	3	missing	2	3	3	3	3	3	3	3	2	3	missing	2	2	3	3	2	2	2	2	2	2	2	2	2	3
	SCORE	2	2	3	3	2.28261	2	2	2	2	2	3	2	2	2	2	1.63043	2	2	3	2	2	2	2	2	2	2	2	2	3	2		64.913	17.2826	24.6304	23	11.2826	6	17	7.63043	12	11
55	RESPONSE	4	1	2	1	2	1	4	4	3	4	3	3	4	1	1	2	2	3	1	3	1	2	3	2	1	2	4	3	2	1
	SCORE	1	1	2	1	2	1	1	1	2	1	3	2	1	1	4	2	2	3	1	2	1	2	3	2	1	2	4	3	3	4		59	17	20	22	12	5	10	10	7	15
56	RESPONSE	3	4	4	2	2	4	3	1	3	1	4	3	2	4	4	4	4	1	4	2	3	4	2	4	3	3	1	2	1	2
	SCORE	2	4	4	2	2	4	2	4	2	4	4	2	3	1	1	4	4	1	4	3	3	4	2	4	3	3	1	2	4	3		86	24	37	25	13	11	25	12	14	11
57	RESPONSE	2	3	2	2	2	4	1	2	2	1	2	1	2	1	2	1	4	1	4	2	1	2	1	1	1	3	3	2	1	1
	SCORE	3	3	2	2	2	4	4	3	3	4	2	4	3	1	3	1	4	1	4	3	1	2	1	1	1	3	3	2	4	4		78	20	25	33	12	8	18	7	18	15
58	RESPONSE	2	2	2	2	2	2	2	2	1	3	2	2	1	2	2	3	2	2	2	2	1	2	2	2	1	2	2	2	1	1
	SCORE	3	2	2	2	2	2	3	3	4	2	2	3	4	2	3	3	2	2	2	3	1	2	2	2	1	2	2	2	4	4		73	19	23	31	13	6	13	10	18	13
																																Mean	68.8213	18.8993	23.574	26.3194	11.7969	7.10239	15.05	8.52405	13.8205	12.4989
																																SE	2.05355	0.703584	0.728834	0.990007	0.48691	0.347977	0.564607	0.30885	0.645542	0.485186
																																SD	14.0784	4.82353	4.99663	6.78715	3.33809	2.38561	3.87075	2.11737	4.42561	3.32627

## Sheet: Autism Quotient
		Q22_1	Q22_2	Q22_3	Q22_4	Q22_5	Q22_6	Q22_7	Q22_8	Q22_9	Q22_10	Q22_11	Q22_12	Q22_13	Q22_14	Q22_15	Q22_16	Q22_17	Q22_18	Q22_19	Q22_20	Q22_21	Q22_22	Q22_23	Q22_24	Q22_25	Q22_26	Q22_27	Q22_28	Q22_29	Q22_30	Q22_31	Q22_32	Q22_33	Q22_34	Q22_35	Q22_36	Q22_37	Q22_38	Q22_39	Q22_40	Q22_41	Q22_42	Q22_43	Q22_44	Q22_45	Q22_46	Q22_47	Q22_48
		Social interactions and general behaviour -1. I prefer to do things with others rather than on my own.	Social interactions and general behaviour -2. I prefer to do things the same way over and over again.	Social interactions and general behaviour -3. If I try to imagine something, I find it very easy to create a picture in my mind.	Social interactions and general behaviour -4. I frequently get so strongly absorbed in one thing that I lose sight of other things.	Social interactions and general behaviour -5. I often notice small sounds when others do not.	Social interactions and general behaviour -6. I usually notice car number plates or similar strings of information.	Social interactions and general behaviour -7. Other people frequently tell me that what Iâ€™ve said is impolite, even though I think it is polite.	Social interactions and general behaviour -8. When Iâ€™m reading a story, I can easily imagine what the characters might look like.	Social interactions and general behaviour -9. I am fascinated by dates	Social interactions and general behaviour -10. In a social group, I can easily keep track of several different peopleâ€™s conversations.	Social interactions and general behaviour -11. I find social situations easy.	Social interactions and general behaviour -12. I tend to notice details that others do not.	Social interactions and general behaviour -13. I would rather go to a library than a party.	Social interactions and general behaviour -14. I find making up stories easy.	Social interactions and general behaviour -15. I find myself drawn more strongly to people than to things.	Social interactions and general behaviour -16. I tend to have very strong interests, which I get upset about if I canâ€™t pursue.	Social interactions and general behaviour -17. I enjoy social chit-chat.	Social interactions and general behaviour -18. When I talk, it isnâ€™t always easy for others to get a word in edgeways.	Social interactions and general behaviour -19. I am fascinated by numbers.	Social interactions and general behaviour -20. When Iâ€™m reading a story, I find it difficult to work out the charactersâ€™ intentions.	Social interactions and general behaviour -21. I donâ€™t particularly enjoy reading fiction.	Social interactions and general behaviour -22. I find it hard to make new friends.	Social interactions and general behaviour -23. I notice patterns in things all the time.	Social interactions and general behaviour -24. I would rather go to the theatre than a museum.	Social interactions and general behaviour -25. It does not upset me if my daily routine is disturbed.	Social interactions and general behaviour -26. I frequently find that I donâ€™t know how to keep a conversation going.	Social interactions and general behaviour -27. I find it easy to â€œread between the linesâ€ when someone is talking to me.	Social interactions and general behaviour -28. I usually concentrate more on the whole picture, rather than the small details.	Social interactions and general behaviour -29. I am not very good at remembering phone numbers.	Social interactions and general behaviour -30. I don't usually notice small changes in a situation, or a person's appearance.	Social interactions and general behaviour -31. I know how to tell if someone listening to me is getting bored.	Social interactions and general behaviour -32. I find it easy to do more than one thing at a time.	Social interactions and general behaviour -33. When I talk on the phone, Iâ€™m not sure when itâ€™s my turn to speak.	Social interactions and general behaviour -34. I enjoy doing things spontaneously.	Social interactions and general behaviour -35. I am often the last to understand the point of a joke.	Social interactions and general behaviour -36. I find it easy to work out what someone is thinking or feeling just by at their face.	Social interactions and general behaviour -37. If there is an interruption, I can switch back to what I was doing very quickly.	Social interactions and general behaviour -38. I am good at social chit-chat.	Social interactions and general behaviour -39. People often tell me that I keep going on and on about the same thing.	Social interactions and general behaviour -40. When I was young, I used to enjoy playing games involving pretending with other children.	Social interactions and general behaviour -41. I like to collect information about categories of things (e.g. types of car, types of bird, types of train, types of plant, etc.).	Social interactions and general behaviour -42. I find it difficult to imagine what it would be like to be someone else.	Social interactions and general behaviour -43. I like to plan any activities I participate in carefully.	Social interactions and general behaviour -44. I enjoy social occasions.	Social interactions and general behaviour -45. I find it difficult to work out peopleâ€™s intentions.	Social interactions and general behaviour -46. New situations make me anxious.	Social interactions and general behaviour -47. I enjoy meeting new people.	Social interactions and general behaviour -48. I am a good diplomat.
Participant number			Score 1 point if response is 3 or 4				Black text: score 1 point if response is 1 or 2					Missing=missing reponses/imputed scores
1	RESPONSE	1	3	4	1	3	4	2	4	4	4	3	3	4	1	1	2	3	3	2	3	4	2	3	1	3	1	2	1	1	1	4	4	1	1	3	3	3	4	3	3	4	2	3	1	2	1	1	1
	SCORE	0	0	1	1	0	0	1	1	0	1	1	0	0	0	0	1	1	0	1	0	0	1	0	0	1	0	0	0	0	0	1	1	1	0	0	1	1	1	0	1	0	1	0	0	1	1	0	0
2	RESPONSE	4	1	1	1	missing	1	1	2	missing	3	4	missing	missing	1	4	1	4	4	3	missing	missing	1	2	3	4	1	2	2	3	1	2	1	2	2	2	missing	3	4	missing	2	1	1	missing	4	1	2	3	2
	SCORE	1	1	0	1	0.522727	1	1	0	0.272727	1	1	0.704545	0.363636	0	1	1	1	0	0	0.340909	0.431818	1	1	1	1	1	0	0	1	0	0	0	1	0	1	0.418605	1	1	0.488372	0	1	1	0.488372	1	1	1	1	0
3	RESPONSE	4	2	4	2	4	4	2	4	4	4	2	2	4	4	4	4	3	4	4	4	4	3	4	4	1	4	2	2	4	4	4	2	4	4	3	3	4	4	4	2	4	4	4	2	2	2	2	2
	SCORE	1	1	1	1	0	0	1	1	0	1	0	1	0	1	1	0	1	0	0	0	0	0	0	1	0	0	0	0	1	1	1	0	0	1	0	1	1	1	0	0	0	0	0	0	1	1	0	0
4	RESPONSE	3	2	2	2	2	2	4	1	3	3	3	1	2	3	3	2	3	2	2	3	4	2	2	2	3	1	1	2	1	3	2	3	3	3	3	1	3	3	3	3	2	3	2	3	3	2	2	2
	SCORE	1	1	0	1	1	1	0	0	0	1	1	1	1	1	1	1	1	1	1	0	0	1	1	0	1	1	0	0	0	1	0	1	0	1	0	0	1	1	0	1	1	0	1	1	0	1	0	0
5	RESPONSE	3	3	1	1	4	1	4	2	4	1	1	1	3	1	3	1	2	2	3	2	1	4	2	1	1	4	2	2	1	3	2	1	4	1	4	1	1	1	2	2	2	1	1	1	2	1	1	1
	SCORE	1	0	0	1	0	1	0	0	0	0	0	1	0	0	1	1	0	1	0	1	1	0	1	0	0	0	0	0	0	1	0	0	0	0	0	0	0	0	1	0	1	1	1	0	1	1	0	0
6	RESPONSE	2	2	1	2	3	1	2	3	2	2	3	2	3	3	2	2	1	3	2	3	2	3	3	2	2	2	3	1	2	3	2	1	3	2	2	2	2	1	2	2	1	3	2	1	3	2	1	3
	SCORE	0	1	0	1	0	1	1	1	1	0	1	1	0	1	0	1	0	0	1	0	1	0	0	0	0	1	1	0	1	0	0	0	0	0	1	0	0	0	1	0	1	0	1	0	0	1	0	1
7	RESPONSE	3	2	2	2	4	4	4	2	4	4	3	2	2	4	3	2	3	3	4	3	1	3	3	3	3	2	1	2	1	1	1	3	3	1	3	2	3	3	4	4	2	1	3	3	2	2	2	2
	SCORE	1	1	0	1	0	0	0	0	0	1	1	1	1	1	1	1	1	0	0	0	1	0	0	1	1	1	0	0	0	0	0	1	0	0	0	0	1	1	0	1	1	1	0	1	1	1	0	0
8	RESPONSE	4	1	2	1	3	1	2	1	2	4	3	2	2	2	2	2	3	2	2	3	2	3	2	3	2	1	3	1	2	1	2	4	1	1	3	2	3	4	2	1	4	missing	3	3	3	2	1	missing
	SCORE	1	1	0	1	0	1	1	0	1	1	1	1	1	0	0	1	1	1	1	0	1	0	1	1	0	1	1	0	0	0	0	1	1	0	0	0	1	1	1	0	0	0.395349	0	1	0	1	0	0.372093
9	RESPONSE	1	2	2	1	2	1	1	3	3	2	3	3	2	3	1	2	3	2	4	1	1	1	1	1	2	2	2	2	1	1	1	1	1	2	1	1	2	2	1	2	1	2	1	2	1	1	1	1
	SCORE	0	1	0	1	1	1	1	1	0	0	1	0	1	0	0	1	1	1	0	1	1	1	1	0	0	1	0	0	0	0	0	0	1	0	1	0	0	0	1	0	1	1	1	0	1	1	0	0
10	RESPONSE	2	2	1	3	3	4	4	1	2	2	3	3	3	2	1	3	2	3	4	3	4	3	3	2	2	2	2	1	4	2	2	2	4	3	4	2	1	2	4	3	2	3	1	1	2	3	1	3
	SCORE	0	1	0	0	0	0	0	0	1	0	1	0	0	0	0	0	0	0	0	0	0	0	0	0	0	1	0	0	1	0	0	0	0	1	0	0	0	0	0	1	1	0	1	0	1	0	0	1
13	RESPONSE	2	3	1	1	1	1	4	1	2	1	3	1	1	1	2	1	3	3	1	4	4	3	1	3	3	3	1	3	4	4	4	1	4	3	4	1	1	2	4	1	3	2	1	3	4	1	2	1
	SCORE	0	0	0	1	1	1	0	0	1	0	1	1	1	0	0	1	1	0	1	0	0	0	1	1	1	0	0	1	1	1	1	0	0	1	0	0	0	0	0	0	0	1	1	1	0	1	0	0
14	RESPONSE	2	2	3	2	4	4	4	3	4	3	4	4	4	1	4	1	3	3	2	4	1	1	2	4	4	2	3	2	1	3	2	4	2	1	3	2	2	4	1	1	4	3	4	4	3	2	3	2
	SCORE	0	1	1	1	0	0	0	1	0	1	1	0	0	0	1	1	1	0	1	0	1	1	1	1	1	1	1	0	0	1	0	1	1	0	0	0	0	1	1	0	0	0	0	1	0	1	1	0
15	RESPONSE	4	4	4	4	4	4	4	4	4	4	4	4	4	4	2	4	2	2	4	4	2	2	1	4	1	4	4	1	4	4	1	1	4	1	4	1	1	1	2	4	1	4	2	2	4	4	1	4
	SCORE	1	0	1	0	0	0	0	1	0	1	1	0	0	1	0	0	0	1	0	0	1	1	1	1	0	0	1	0	1	1	0	0	0	0	0	0	0	0	1	1	1	0	1	0	0	0	0	1
17	RESPONSE	4	3	1	2	3	3	2	2	4	3	4	3	4	3	4	4	4	4	4	2	4	4	2	1	4	3	4	3	3	2	1	1	3	3	3	4	3	4	3	4	4	3	1	4	1	1	4	4
	SCORE	1	0	0	1	0	0	1	0	0	1	1	0	0	1	1	0	1	0	0	1	0	0	1	0	1	0	1	1	1	0	0	0	0	1	0	1	1	1	0	1	0	0	1	1	1	1	1	1
18	RESPONSE	3	1	1	1	4	4	2	3	4	3	4	3	3	4	3	2	4	4	1	2	3	1	2	4	4	1	2	3	2	1	2	3	3	3	2	3	3	4	2	3	3	3	2	2	2	1	4	1
	SCORE	1	1	0	1	0	0	1	1	0	1	1	0	0	1	1	1	1	0	1	1	0	1	1	1	1	1	0	1	0	0	0	1	0	1	1	1	1	1	1	0	0	0	1	0	1	1	1	0
19	RESPONSE	4	2	2	1	4	2	4	2	2	2	1	2	4	2	4	1	1	2	4	2	4	4	2	1	1	4	1	3	1	2	1	2	missing	1	2	2	2	1	3	2	1	3	2	1	2	1	1	2
	SCORE	1	1	0	1	0	1	0	0	1	0	0	1	0	0	1	1	0	1	0	1	0	0	0	0	0	0	0	1	0	0	0	0	0.324324	0	1	0	0	0	0	0	1	0	1	0	1	1	0	0
20	RESPONSE	3	2	2	1	3	4	3	3	2	4	4	2	1	3	2	3	3	2	3	3	1	2	2	1	3	1	2	2	1	4	3	3	3	2	3	3	3	4	3	3	3	3	1	4	2	2	2	3
	SCORE	1	1	0	1	0	0	0	1	1	1	1	1	1	1	0	0	1	1	0	0	1	1	1	0	1	1	0	0	0	1	1	1	0	0	0	1	1	1	0	1	0	0	1	1	1	1	0	1
21	RESPONSE	3	2	1	1	2	4	4	2	4	2	4	2	1	1	4	1	2	4	4	3	3	1	3	4	3	1	2	3	1	1	1	2	4	3	4	2	3	4	4	1	4	4	4	2	4	2	2	2
	SCORE	1	1	0	1	1	0	0	0	0	0	1	1	1	0	1	1	0	0	0	0	0	1	0	1	1	1	0	1	0	0	0	0	0	1	0	0	1	1	0	0	0	0	0	0	0	1	0	0
22	RESPONSE	4	1	1	3	3	3	2	1	2	1	4	1	1	1	1	4	4	4	3	4	4	1	1	4	2	2	1	1	1	4	1	1	4	4	4	1	1	3	2	2	1	1	1	4	4	1	4	1
	SCORE	1	1	0	0	0	0	1	0	1	0	1	1	1	0	0	0	1	0	0	0	0	1	1	1	0	1	0	0	0	1	0	0	0	1	0	0	0	1	1	0	1	1	1	1	0	1	1	0
23	RESPONSE	2	2	1	3	2	2	4	2	3	2	2	2	3	4	2	3	2	2	2	2	2	2	2	2	2	2	2	2	2	2	2	2	2	2	2	2	2	2	2	2	2	2	2	2	2	2	2	2
	SCORE	0	1	0	0	1	1	0	0	0	0	0	1	0	1	0	0	0	1	1	1	1	1	1	0	0	1	0	0	0	0	0	0	1	0	1	0	0	0	1	0	1	1	1	0	1	1	0	0
25	RESPONSE	1	1	4	1	2	1	2	1	3	4	3	2	4	1	3	4	2	4	4	1	1	1	1	1	2	2	1	3	3	1	1	3	4	1	3	2	3	3	2	1	1	3	2	2	2	1	4	4
	SCORE	0	1	1	1	1	1	1	0	0	1	1	1	0	0	1	0	0	0	0	1	1	1	1	0	0	1	0	1	1	0	0	1	0	0	0	0	1	1	1	0	1	0	1	0	1	1	1	1
26	RESPONSE	3	2	2	2	1	1	1	1	3	2	2	3	1	1	2	1	2	1	3	2	3	2	2	3	4	4	2	2	1	2	3	4	3	1	1	2	3	2	2	4	1	1	2	3	2	1	3	2
	SCORE	1	1	0	1	1	1	1	0	0	0	0	0	1	0	0	1	0	1	0	1	0	1	1	1	1	0	0	0	0	0	1	1	0	0	1	0	1	0	1	1	1	1	1	1	1	1	1	0
29	RESPONSE	1	2	1	1	2	2	4	4	4	2	1	1	4	4	1	2	1	3	2	3	4	4	4	3	3	4	2	3	4	4	1	3	4	1	4	1	3	1	2	3	4	4	4	1	3	2	3	1
	SCORE	0	1	0	1	1	1	0	1	0	0	0	1	0	1	0	1	0	0	1	0	0	0	0	1	1	0	0	1	1	1	0	1	0	0	0	0	1	0	1	1	0	0	0	0	0	1	1	0
30	RESPONSE	3	2	1	1	1	1	3	2	3	4	2	1	3	3	3	3	3	3	2	3	2	3	2	2	3	2	2	2	3	3	1	3	2	2	4	2	3	2	4	2	2	3	3	2	3	1	2	3
	SCORE	1	1	0	1	1	1	0	0	0	1	0	1	0	1	1	0	1	0	1	0	1	0	1	0	1	1	0	0	1	1	0	1	1	0	0	0	1	0	0	0	1	0	0	0	0	1	0	1
31	RESPONSE	4	4	1	2	2	1	3	2	4	1	1	1	2	2	1	2	1	3	4	3	4	1	1	3	1	1	2	3	3	3	2	2	2	2	2	missing	missing	missing	missing	missing	missing	missing	missing	missing	missing	missing	missing	missing
	SCORE	1	0	0	1	1	1	0	0	0	0	0	1	1	0	0	1	0	0	0	0	0	1	1	1	0	1	0	1	1	1	0	0	1	0	1	0.4186	0.522727	0.545455	0.48837	0.477273	0.5	0.39535	0.48837	0.586957	0.477273	0.909091	0.444444	0.37209
32	RESPONSE	1	3	1	2	2	1	2	2	3	4	1	2	4	2	2	4	2	3	2	3	4	4	3	2	1	3	3	2	3	3	3	missing	4	2	4	3	2	1	4	2	2	3	3	1	2	1	1	1
	SCORE	0	0	0	1	1	1	1	0	0	1	0	1	0	0	0	0	0	0	1	0	0	0	0	0	0	0	1	0	1	1	1	0	0	0	0	1	0	0	0	0	1	0	0	0	1	1	0	0
35	RESPONSE	2	2	4	4	1	1	1	4	4	4	4	4	4	2	3	2	2	3	4	4	4	2	4	4	2	3	3	3	4	4	1	4	1	2	4	1	1	3	4	3	4	2	3	1	1	2	2	4
	SCORE	0	1	1	0	1	1	1	1	0	1	1	0	0	0	1	1	0	0	0	0	0	1	0	1	0	0	1	1	1	1	0	1	1	0	0	0	0	1	0	1	0	1	0	0	1	1	0	1
37	RESPONSE	3	3	2	2	3	3	4	2	2	3	2	2	3	3	2	2	2	2	2	3	3	3	3	2	2	3	2	3	2	3	2	3	3	2	3	2	2	2	3	3	2	3	3	2	3	2	2	2
	SCORE	1	0	0	1	0	0	0	0	1	1	0	1	0	1	0	1	0	1	1	0	0	0	0	0	0	0	0	1	0	1	0	1	0	0	0	0	0	0	0	1	1	0	0	0	0	1	0	0
38	RESPONSE	2	1	2	2	3	2	1	1	3	3	2	3	4	3	2	4	3	4	2	2	2	4	2	1	3	4	3	2	1	1	2	4	4	3	4	2	3	3	3	2	2	2	3	2	3	1	2	2
	SCORE	0	1	0	1	0	1	1	0	0	1	0	0	0	1	0	0	1	0	1	1	1	0	1	0	1	0	1	0	0	0	0	1	0	1	0	0	1	1	0	0	1	1	0	0	0	1	0	0
39	RESPONSE	4	3	2	2	4	1	4	3	1	4	4	4	1	4	4	4	4	1	2	2	3	1	1	1	4	1	1	2	3	4	1	3	2	3	1	3	2	4	4	4	4	1	4	4	1	1	4	1
	SCORE	1	0	0	1	0	1	0	1	1	1	1	0	1	1	1	0	1	1	1	1	0	1	1	0	1	1	0	0	1	1	0	1	1	1	1	1	0	1	0	1	0	1	0	1	1	1	1	0
41	RESPONSE	2	1	3	1	4	2	1	3	3	4	4	4	4	4	4	1	4	4	4	4	4	1	4	2	4	1	4	2	1	1	4	4	2	1	2	4	2	4	4	4	4	2	4	4	2	1	4	4
	SCORE	0	1	1	1	0	1	1	1	0	1	1	0	0	1	1	1	1	0	0	0	0	1	0	1	1	1	1	0	0	0	1	1	1	0	1	1	0	1	0	1	0	1	0	1	1	1	1	1
42	RESPONSE	1	1	4	1	1	1	1	4	3	1	4	1	1	4	4	1	4	4	1	1	2	1	1	4	4	1	4	3	1	4	4	4	1	4	1	4	4	4	1	4	2	1	1	4	1	1	4	4
	SCORE	0	1	1	1	1	1	1	1	0	0	1	1	1	1	1	1	1	0	1	1	1	1	1	1	1	1	1	1	0	1	1	1	1	1	1	1	1	1	1	1	1	1	1	1	1	1	1	1
43	RESPONSE	3	2	2	1	1	2	1	2	2	4	4	1	1	1	3	1	2	4	4	3	2	2	3	4	4	2	1	3	4	3	2	3	4	3	3	2	2	2	2	4	1	3	1	3	2	1	3	2
	SCORE	1	1	0	1	1	1	1	0	1	1	1	1	1	0	1	1	0	0	0	0	1	1	0	1	1	1	0	1	1	1	0	1	0	1	0	1	1	1	1	1	1	0	1	0	1	1	1	0
44	RESPONSE	2	3	1	2	1	1	1	1	3	2	2	1	4	1	1	1	1	4	4	4	4	3	1	2	3	2	3	3	2	4	2	2	3	1	3	2	3	2	2	1	4	3	1	2	4	1	2	1
	SCORE	0	0	0	1	1	1	1	0	0	0	0	1	0	0	0	0	0	0	0	0	0	0	1	0	1	1	1	1	0	1	0	0	0	0	0	1	0	1	1	0	0	0	1	1	0	1	0	0
45	RESPONSE	4	1	1	4	1	3	2	1	3	4	4	1	3	3	2	1	3	4	1	4	4	2	1	1	3	2	2	2	2	3	4	3	4	1	1	2	4	4	3	1	2	4	3	3	3	2	2	1
	SCORE	1	1	0	0	1	0	1	0	0	1	1	1	0	1	0	1	1	0	1	0	0	1	1	0	1	1	0	0	0	1	1	1	0	0	1	1	0	0	0	0	1	0	0	0	0	1	0	0
46	RESPONSE	4	1	1	1	1	1	3	3	3	2	4	2	1	3	3	3	4	4	3	3	3	1	1	4	4	3	3	2	1	2	2	4	3	2	4	2	3	4	3	3	4	2	1	4	3	1	4	3
	SCORE	1	1	0	1	1	1	0	1	0	0	1	1	1	1	1	0	1	0	0	0	0	1	1	1	1	0	1	0	0	0	0	1	0	0	0	1	0	0	0	1	0	1	1	0	0	1	1	1
47	RESPONSE	1	2	1	1	1	1	3	3	4	2	2	1	4	1	1	2	2	2	4	3	1	4	1	4	2	2	2	3	2	2	1	2	3	3	3	2	2	2	2	2	3	3	2	1	3	2	2	2
	SCORE	0	1	0	1	1	1	0	1	0	0	0	1	0	0	0	1	0	1	0	0	1	0	1	1	0	1	0	1	0	0	0	0	0	1	0	1	1	1	1	0	0	0	1	1	0	1	0	0
48	RESPONSE	3	4	1	2	3	3	3	1	3	2	3	2	4	1	3	2	4	3	1	3	4	3	2	3	2	3	4	2	3	4	2	3	3	2	3	3	2	3	4	4	3	3	3	2	3	2	3	4
	SCORE	1	0	0	1	0	0	0	0	0	0	1	1	0	0	1	1	1	0	1	0	0	0	1	1	0	0	1	0	1	1	0	1	0	0	0	0	1	0	0	1	0	0	0	1	0	1	1	1
51	RESPONSE	1	2	2	3	3	4	3	2	2	3	4	2	3	1	3	1	3	2	2	3	3	1	2	1	3	1	2	3	1	4	2	2	4	3	4	4	1	4	3	2	4	4	3	4	3	1	4	3
	SCORE	0	1	0	0	0	0	0	0	1	1	1	1	0	0	1	1	1	1	1	0	0	1	1	0	1	1	0	1	0	1	0	0	0	1	0	0	1	0	0	0	0	0	0	0	0	1	1	1
52	RESPONSE	1	3	3	2	1	4	3	4	4	2	1	4	4	2	2	4	1	1	3	1	1	4	2	2	1	4	1	2	1	1	2	3	4	2	4	3	2	1	2	3	4	2	3	1	3	3	1	3
	SCORE	0	0	1	1	1	0	0	1	0	0	0	0	0	0	0	0	0	1	0	1	1	0	1	0	0	0	0	0	0	0	0	1	0	0	0	0	1	1	1	1	0	1	0	1	0	0	0	1
54	RESPONSE	2	2	1	2	3	3	3	2	3	3	2	2	2	3	3	2	3	3	3	3	2	3	2	3	2	2	2	2	2	2	3	2	3	2	3	2	2	3	3	3	2	2	3	2	3	2	3	3
	SCORE	0	1	0	1	0	0	0	0	0	1	0	1	1	1	1	1	1	0	0	0	1	0	1	1	0	1	0	0	0	0	1	0	0	0	0	1	1	0	0	1	1	1	0	1	0	1	1	1
55	RESPONSE	3	1	2	2	1	1	4	1	4	3	4	1	2	3	3	3	4	4	3	3	4	2	2	2	4	1	1	3	3	2	1	3	3	3	4	1	3	4	2	1	2	3	4	3	3	1	3	2
	SCORE	1	1	0	1	1	1	0	0	0	1	1	1	1	1	1	0	1	0	0	0	0	1	1	0	1	1	0	1	1	0	0	1	0	1	0	1	0	0	1	0	1	0	0	0	0	1	1	0
56	RESPONSE	1	4	1	1	1	3	1	2	4	2	4	1	3	3	4	1	4	2	3	2	4	1	3	4	3	3	4	4	1	4	2	3	3	2	1	3	3	4	1	3	4	3	2	3	1	1	3	4
	SCORE	0	0	0	1	1	0	1	0	0	0	1	1	0	1	1	1	1	1	0	1	0	1	0	1	1	0	1	1	0	1	0	1	0	0	1	0	0	0	1	1	0	0	1	0	1	1	1	1
57	RESPONSE	3	1	3	2	1	2	4	4	4	2	3	2	4	4	2	4	2	3	4	2	1	4	2	1	2	4	1	2	2	1	2	2	3	missing	4	2	2	2	2	4	4	3	4	3	4	2	2	2
	SCORE	1	1	1	1	1	1	0	1	0	0	1	1	0	1	0	0	0	0	0	1	1	0	1	1	1	0	0	0	0	0	0	0	0	0.340909	0	1	1	1	1	1	0	0	0	0	0	1	0	0
58	RESPONSE	4	3	2	2	2	1	4	4	2	3	1	2	4	3	2	2	2	3	2	2	2	1	2	3	2	2	2	3	4	2	2	4	4	1	3	2	3	2	2	2	3	4	3	1	3	3	1	2
	SCORE	1	0	0	1	1	1	0	1	1	1	0	1	0	1	0	1	0	0	1	1	1	1	1	1	0	1	0	1	1	0	0	1	0	0	0	1	0	1	1	0	0	0	0	1	0	0	0	0
45
[truncated: 8 more columns]

## Sheet: Kessler Psych Distress K10
	Q23_1	Q23_2	Q23_3	Q23_4	Q23_5	Q23_6	Q23_7	Q23_8	Q23_9	Q23_10
	Mood and feelings: These questions concern how you have been feeling over the past 30 days.-1. During the last 30 days, about how often did you feel tired out for no good reason?	Mood and feelings: These questions concern how you have been feeling over the past 30 days.-2. During the last 30 days, about how often did you feel nervous?	Mood and feelings: These questions concern how you have been feeling over the past 30 days.-3. During the last 30 days, about how often did you feel so nervous that nothing could calm you down?	Mood and feelings: These questions concern how you have been feeling over the past 30 days.-4. During the last 30 days, about how often did you feel hopeless?	Mood and feelings: These questions concern how you have been feeling over the past 30 days.-5. During the last 30 days, about how often did you feel restless or fidgety?	Mood and feelings: These questions concern how you have been feeling over the past 30 days.-6. During the last 30 days, about how often did you feel so restless you could not sit still?	Mood and feelings: These questions concern how you have been feeling over the past 30 days.-7. During the last 30 days, how often did you feel depressed?	Mood and feelings: These questions concern how you have been feeling over the past 30 days.-8. During the last 30 days, about how often did you feel that everything was an effort?	Mood and feelings: These questions concern how you have been feeling over the past 30 days.-9. During the last 30 days, about how often did you feel so sad that nothing could cheer you up?	Mood and feelings: These questions concern how you have been feeling over the past 30 days.-10. During the last 30 days, about how often did you feel worthless?
Participant number	Red=imputed values										Total score
1	3	3	3	2	2	1	1	2	1	2	20
2	4	3	1	4	2	1	5	4	4	5	33
3	5	3	2	3	3	3	3	3	2	2	29
4	3	4	3	3	2	2	3	3	3	3	29
5	4	3	2	3	3	4	3	3	3	1	29
6	3	4	3	3	2	2	3	3	4	3	30
7	2	2	1	1	2	1	1	1	1	1	13
8	3	3	5	3	3	5	5	3	5	5	40
9	5	5	3	1	5	5	5	5	5	5	44
10	3	3	1	2	3	1	3	2	2	3	23
13	5	5	5	5	5	5	5	5	5	5	50
14	2	3	2	1	5	3	1	1	1	1	20
15	3	1	1	1	5	3	1	3.02326	1	1	20.0233
17	1	3	4	3	4	3	2	3	4	3	30
18	2	3	1	1	3.16667	3	2	1	1	1	18.1667
19	5	4	5	5	4	3	4	5	3	4	42
20	2	3	2	3	2	1	2	2	2	2	21
21	4	3	2	4	3	2	5	5	4	5	37
22	4	3	1	3	3	1	4	4	4	3	30
23	3	3	3	3	3	3	3	3	3	3	30
25	4	1	1	4	3	1	4	4	4	4	30
26	3	3	2	3	3	2	2	2	1	2	23
29	2	2	1	2	2	1	2	2	1	2	17
30	4	3	1	1	3	2	1	1	1	1	18
32	4	1	1	1	2	1	2	2	1	1	16
35	5	3	3	3	3	3	3	3	3	3	32
37	3	2	1	1	1	1	1	1	1	1	13
38	4	3	3	3	3.16667	2	4	4	3	3	32.1667
39	5	5	3	5	5	4	5	5	4	4	45
41	4	4	3	3	3	2	4	2	1	4	30
42	3	5	4	5	1	1	5	4	4	5	37
43	3	3	2	4	2	1	3	4	1	5	28
44	4	2	3	4	3	2	2	2	3	3	28
45	2	2	2	2	4	4	1	2	1	1	21
46	5	5	4	4	4	4	5	5	5	4	45
47	4	2	1	2	3	2	2	2	1	1	20
48	2	1	1	1	2	1	1	1	1	1	12
51	3	3	2	4	5	4	4	3	3	3	34
52	5	2	1	4	5	3	3	5	2	3	33
54	2	2	2	2	2	1	2	2	2	2	19
55	3	2	1	2	4	3	2	4	2	2	25
56	3	5	4	4	5	4	5	4	3	4	41
57	4	1	1	3	4	2	2	4	2	2	25
58	5	4	3	4	3	3	3	4	4	4	37
										Mean	28.3945
										SE	1.43201
										SD	9.49888

## Sheet: Disruptive Behaviour Disorder
	Q24_1	Q24_2	Q24_3	Q24_4	Q24_5	Q24_6	Q24_7	Q24_8	Q24_9	Q24_10	Q24_11	Q24_12	Q24_13	Q24_14	Q24_15	Q24_16	Q24_17	Q24_18	Q24_19	Q24_20	Q24_21	Q24_22	Q24_23	Q24_24	Q24_25	Q24_26	Q24_27	Q24_28	Q24_29	Q24_30	Q24_31	Q24_32	Q24_33	Q24_34	Q24_35	Q24_36	Q24_37	Q24_38	Q24_39	Q24_40	Q24_41	Q24_42	Q24_43	Q24_44	Q24_45
	Disorderly behaviour -1. You often interrupt or intrude on others (e.g., butt into conversations or games)	Disorderly behaviour -2. You have often run away from home overnight at least twice when living in parental or parental surrogate home often (or once without returning for a lengthy period	Disorderly behaviour -3. You often argue with adults	Disorderly behaviour -4. You often lie to obtain goods or favors or to avoid obligations (i.e., "cons" others)	Disorderly behaviour -5. You often initiate physical fights with other members of his or her household	Disorderly behaviour -6. You have been physically cruel to people	Disorderly behaviour -7. You often talk excessively	Disorderly behaviour -8. You have stolen items of non-trivial value without confronting a victim (g., shoplifting, but without breaking and entering; forgery)	Disorderly behaviour -9. You are often easily distracted by extraneous stimuli	Disorderly behaviour -10. You have often engaged in physically difficult activities without considering possible consequences (e.g. running into the middle of the road without thinking)	Disorderly behaviour -11. You were often a truant at school, staring from 13 years of age onwards	Disorderly behaviour -12. You often fidget with hands or feet or squirms in your seat	Disorderly behaviour -13. You are often spiteful or vindictive	Disorderly behaviour -14. You often swear or use obscene language	Disorderly behaviour -15. You often blames others for their mistakes or misbehavior	Disorderly behaviour -16. You have deliberately destroyed others' property (other than by fire setting)	Disorderly behaviour -17. You often actively defy or refuse to comply with adults' requests or rules	Disorderly behaviour -18. You often do not seem to listen when spoken to directly	Disorderly behaviour -19. You often blurt out answers before questions have been completed	Disorderly behaviour -20. You often initiate physical fights with others who do not live in your household	Disorderly behaviour -21. You often shift fro one uncompleted idea to another	Disorderly behaviour -22. You have difficulty playing or engaging in leisure activities quietly	Disorderly behaviour -23. You often fail to give close attention to details or make careless mistakes in work, or other activities	Disorderly behaviour -24. You are often angry and resentful	Disorderly behaviour -25. You often leave seat in situations in which remaining seated is expected	Disorderly behaviour -26. You are often touchy or easily annoyed by others	Disorderly behaviour -27. You often do not follow through on instructions and fail to finish hobbys, or duties in the workplace (not due to oppositional behavior or failure to understand instructions)	Disorderly behaviour -28. You often lose your temper	Disorderly behaviour -29. You often have difficulty sustaining attention in tasks or play activities	Disorderly behaviour -30. You often have difficulty awaiting turn	Disorderly behaviour -31. You have forced someone into sexual activity	Disorderly behaviour -32. You often bully, threaten, or intimidate others	Disorderly behaviour -33. You are often "on the go" or often act as if "driven by a motor"	Disorderly behaviour -34. You often lose things necessary for tasks or activities (e.g. books, or tools)	Disorderly behaviour -35. You often run about or climb excessively in situations in which it is inappropriate (in adolescents or adults, may be subject to feelings of restlessness)	Disorderly behaviour -36. You have been physically cruel to animals	Disorderly behaviour -37. You often avoid or dislike or are reluctant to engage in tasks that required sustained mental effort	Disorderly behaviour -38. You often stayed out at night despite parental prohibitions before the age of 13	Disorderly behaviour -39. You often deliberately annoy people	Disorderly behaviour -40. You have stolen while confronting a victim (e.g. mugging, purse-snatching)	Disorderly behaviour -41. You have deliberately engaged in fire setting with the intention of causing serious damage	Disorderly behaviour -42. You often have difficulty organizing tasks and activities	Disorderly behaviour -43. You have broken into somebody else's house, building or car	Disorderly behaviour -44. You are often forgetful in daily activities	Disorderly behaviour -45. You have used a weapon that can cause serious harm to others (e.g. bat, brick, broken bottle, knife)
Participant number																																															ADHD inattention symptoms (max. 9)	Mean inattention score	Total inattention score
	0=not at all, 1=just a little, 2=pretty much, 3=very much						Red=imputed values
																																																Consistent with diagnostic criteria
2	3	0	0.974359	2	0	0	0	0.179487	2	0.846154	0.657895	1	3	1	3	0	0.820513	2	2	0	2	0.769231	0.820513	3	0.589744	2	3	2	2	0.692308	1	1	0	1	1	0	1.12821	0.421053	2	0	0	0	0	2	0		5	1.54986	13.9487
4	0	0	1	1	0	0	0	0	1	0	0	1	0	0	1	0	1	0	0	0	1	1	1	1	1	2	1	2	1	0	0	1	1	0	0	0	1	0	1	0	0	1	0	0	0		0	0.666667	6
5	0	0	2	0	0	0	0	0	0	0	0.65789	0	0.794872	1	1	0	1	2	0	0	2	2	1	1	1	2	1	0	1	1	0	0	1	3	2	0	2	0	1	1	0	0	0	3	0		4	1.44444	13
7	0	0	0	0	0	0	0	0	2	0	0	0	1	1	0	0	1	1	1	0	1	1	1	1	0	1	1	1	1	0	0	0	1	1	0	0	1	0	0	0	0	1	0	1	0		1	1.11111	10
8	0	0	0	0	0	0	1	0	2	1	0	2	0	1	1	0	0	0	1	0	2	1	1	1	0	0	1	0	0	1	0	0	1	1	1	0	1	0	0	0	0	1	0	0	0		1	0.777778	7
10	0	0	1	0	0	0	0	0	1	0	3	2	1	1	2	0	1	0	1	0	1	0	1	1	1	3	0	1	1	0	0	0	1	0	0	0	0	0	1	0	0	0	0	1	0		0	0.444444	4
13	0	0	1	1	0	0	0	0	0	0	0	2	1	1	1	0	1	1	0	0	2	0	0	3	1	3	2	3	1	0	0	0	3	0	1	0	0	0.42105	1	0	0	0	0	0	0		1	0.444444	4
14	1	1	0	0	0	1	2	1	3	1	3	3	1	3	2	1	0	1	0	0	2	2	2	2	0	2	1	1	2	1	0	0	1	0	1	1	3	3	2	0	0	3	0	2	0		6	1.88889	17
15	0	1	2	0	0	0	1	0	0	2	0	2	2	3	2	0	2	2	2	0	2	2	2	0	2	2	0	2	0	2	0	1	3	1	0.512821	0	1	0	1	0	0	0	0.0512821	1	0		2	0.777778	7
17	2	0	2	1	3	0	0	0	1	0	0	1	2	2	3	1	1	2	1	0	3	0	0	2	1	2	1	2	3	2	0	0	1	2	0	0	2	0	3	0	0	0	0	3	0		5	1.55556	14
18	1	0	1	0	0	0	0	0	0	0	0	0	0	1	1	0	1	2	0	0	1	0	1	0	0	1	0	0	0	0	0	0	1	0	0	0	0	0	0	0	0	1	0	0	0		1	0.444444	4
19	2	0	2	0	1	0	2	0	2	3	2	1	2	2	2	1	2	1	1	0	2	2	0	2	1	1	0	1	1	1	0	0	1	2	2	2	1	3	1	0	1	1	0	3	0		3	1.22222	11
20	0	0	0	0	0	0	0	0	2	0	0	0	0	0	0	0	0	0	0	0	3	1	1	1	0	1	1	1	2	0	0	0	0	2	0	0	2	0	0	0	0	1	0	2	0		5	1.44444	13
21	0	0	0	1	0	0	0	0	2	1	0	3	1	0	1	0	1	0	0	0	2	0	1	1	0	1	2	1	1	0	0	0	0	0	0	0	1	0	0	0	0	2	1	1	0		3	1.11111	10
22	1	0	1	0	0	0	1	0	0	0	1	0	0	0	0	0	0	0	1	0	0	0	0	0	0	0	0	1	0	0	0	0	0	0	0	0	0	0	0	0	0	0	0	0	0		0	0	0
23	1	1	1	1	1	1	1	1	1	1	1	1	1	1	1	1	1	1	1	1	1	1	1	1	1	1	1	1	1	1	1	1	1	1	1	1	1	1	1	1	1	1	1	1	1		0	1	9
25	1	0	1	0	1	0	1	0	3	3	0	0	1	2	2	0	0	0	2	0	2	0	1	2	0	3	3	2	2	0	0	1	2	2	1	0	2	0	0	0	0	2	0	2	0		7	1.88889	17
26	2	0	2	1	3	3	3	0	2	0	1	3	2	2	1	0	3	2	1	0	1	0	0	2	1	2	1	2	1	0	1	2	1	0	0	2	2	0	2	0	0	1	0	0	0		3	1	9
29	1	0	1	0	0	0	1	1	0	1	2	2	0	3	1	0	1	0	1	0	1	2	0	0	1	1	0	2	1	1	0	0	3	0	3	0	1	0	1	0	0	0	0	1	0		0	0.333333	3
30	0	0	0	0	0	0	0	0	1	0	0	2	0	0	2	0	0	0	0	0	0	0	0	1	0	1	0	0	0	0	0	0	2	0	0	0	0	0	0	0	0	0	0	0	0		0	0.111111	1
32	1	0	1	0	0	0	0	0	1	0	0	1	0	0	0	0	0	1	1	0	0	0	1	0	0	0	0	0	0	1	0	0	0	1	0	0	0	0	0	0	0	0	0	1	0		0	0.555556	5
35	2	2	2	2	2	1	1	0	0	0	1	1	0	1	1	0	1	2	1	1	1	1	1	1	2	1	1	2	1	1	1	1	1	1	2	0	0	1	1	1	0	1	0	1	1		1	0.888889	8
37	2	0	0	0	0	0	1	0	0	0	0	0	0	0	0	0	0	0	0.846154	0	0	0	0	0	0	0	0	1	0	0	0	0	0	0	0	0	0	0	0	0	0	0	0	0	0		0	0	0
38	0	0	0	0	0	0	0	1	0	3	1	0	0	3	1	0	0	0	0	0	1	1	1	0	1	1	1	1	2	1	2	1	1	2	0	0	0	0	0	0	0	0	0	2	0		3	0.888889	8
39	0	0	0	0	0	0	0	0	2	0	0	0	0	0	0	0	0	1	2	0	0	0	0	1	1	1	1	1	3	3	0	0	0	0	0	0	2	0	0	0	0	0	0	0	0		3	1	9
41	1	3	3	3	3	1	0	1	3	3	3	2	3	3	3	3	3	3	3	1	3	3	3	3	1	3	3	3	3	3	0	1	3	3	0	0	3	3	2	0	0	3	0	3	0		9	3	27
42	0	0	1	0	0	0	0	0	1	1	0	0	0	0	0	0	0	1	0	0	0	2	1	0	1	1	2	1	1	0	0	0	0	3	0	0	2	0	0	0	0	3	0	3	0		5	1.88889	17
43	0	0	0	1	0	0	1	0	3	0	1	0	0	1	1	0	1	1	0	0	1	0	1	1	0	1	0	0	1	0	0	0	1	1	0	0	1	0	0	0	0	1	0	1	0		1	1.11111	10
44	0	0	1	0	0	0	0	1	0	2	1	1	0	1	1	0	0	1	0	0	1	0	0	1	0	1	1	2	0	0	0	0	1	1	1	0	1	0	1	0	0	1	0	1	0		0	0.666667	6
45	0	0	0	0	0	1	0	0	1	0	0	2	1	2	0	0	0	1	1	0	1	0	0	0	0	0	0	0	0	0	0	0	2	0	0	0	0	0	0	0	0	0	0	0	0		0	0.222222	2
46	1	0	1	0	0	0	0	0	2	0	0	2	1	1	2	0	0	1	1	0	2	0	0	2	1	2	0	3	2	2	0	0	1	0	0	0	2	0	0	0	0	2	0	1	0		4	1.11111	10
47	1	0	1	0	0	1	1	0	1	1	0	2	1	2	1	0	0	1	1	0	1	0	1	1	0	2	1	2	1	0	0	0	2	0	0	0	2	0	0	0	0	0	0	1	0		1	0.888889	8
48	1	0	0	0	0	0	0	0	1	2	0	1	0	0	2	0	1	1	2	0	1	2	1	0	0	1	1	1	1	1	0	0	1	2	0	0	2	0	0	0	0	0	0	1	0		2	1.11111	10
51	0	0	1	1	0	0	3	0	2	1	0	3	1	3	2	0	1	1	2	0	2	1	1	1	1	2	3	2	1	1	2	0	1	0	1	0	2	1	2	0	0	2	0	2	0		5	1.55556	14
52	1	0	1	1	0	0	3	1	1	0	1	3	0	1	1	0	1	1	1	0	1	1	1	1	1	1	1	1	2	1	0	0	1	1	0	0	1	0	1	0	0	1	0	1	1		1	1.11111	10
54	0	0	0	0	0	0	1	0	0	1	1	1	0	1	0	0	1	1	0	0	0	0	0	0	0	0	0	0	0	1	0	0	0	0	0	0	0	0	0	0	0	0	0	0	0		0	0.111111	1
55	0	0	2	1	0	0	0	0	1	1	0	2	0	2	1	0	1	1	1	0	2	1	0	2	0	2	1	2	1	0	0	0	1	1	1	0	1	0	1	0	0	0	0	1	1		0	0.777778	7
56	2	1	3	2	1	1	3	0	3	2	1	2	2	1	2	0	3	3	2	1	3	1	3	3	1	2	3	2	2	1	1	1	2	3	0	1	2	0	2	0	1	2	0	2	0		9	2.55556	23
57	0	0	2	0	0	1	0	0	1	0	0	1	2	2	2	0	1	1	0	0	2	0	2	2	0	2	1	3	0	0	0	1	0	1	1	0	1	1	2	0	0	1	0	1	2		1	1	9
58	0	1	1	0	0.384615	1	1	0	1	3	2	2	2	2	2	1	1	1	0	1	2	2	1	2	2	2	1	1.33333	1	1	0	1	2	2	1	1	1	3	1	0	0	1	0	1	0		1	1.11111	10
40
																																														Mean	2.325	1.0193	9.17372
																																														SE	0.40094	0.102489	0.9224
																																														SD	2.53577	0.648197	5.83377
[truncated: 12 more columns]
