# Supplementary material for: Behavioural and Psychiatric Phenotypes in Men and Boys with X-Linked Ichthyosis: Evidence from a Worldwide Online Survey
Source: PLoS One. 2016 Oct 6;11(10):e0164417. doi: 10.1371/journal.pone.0164417 (PMC5053497; doi:10.1371/journal.pone.0164417)
Supplement: S2 Table — (XLSX) [file pone.0164417.s002.xlsx]

## Sheet: Demographic
	Q35	Q36	Q37	Q38	Q40_1	Q41	Q43	Q44	Q45	Q46	Q47
Participant number	How old is your son?	In which country does your son live in?	Which hand does your son use most frequently? 1=right, 2=left, 3=both	What is your son's ethnic origin?	How was your son's XLI diagnosed or confirmed?	If XLI was confirmed by genetic test, do you know which mutation was found? 1=typical deletion, 2=atypical deletion, 3=point mutation in STS, 4=don't know	How would you describe your son's personality? 1=optimistic and social, 2=Short-tempered and irritable, 3=analytical and quiet, 4=relaxed and peaceful	Does your son have any talents or disabilites of note? 1=yes, 2=no	If yes, please provide further details	Has your son ever been diagnosed with a brain-related condition (e.g. a developmental disorder su...	If yes, please give conditions, main symptoms and approximate age at diagnosis
1	8	Us	1	Hispanic	Skin appearance and family history		4	2		2
2	7	USA	1	caucasian	Skin appearance and family history		3	1	He is currently reading at a fifth grade reading level	1	He was diagnosed with delayed speech and articulation at 3 years of age and has received speech services through the local school district since that time.
3	5	United States	1	Black	Skin appearance, family history and genetic test	4	1	2		1	ADHD, he's very energetic, can't sit still and has trouble focusing
4	12	United States of America	1	caucasian	Skin appearance, family history and genetic test	3	2	1	excellent athlete, excellent coordination, remarkable memory	2
5	11	U.K.	3	White British	Skin appearance and family history		2	1	Dyspraxia Irlens syndrome & Avoidance and Restrictive Food Intake Disorder	1	Autistic Spectrum Disorder just diagnosed 7/1/16; Dyspraxia Irlens syndrome & Avoidance and Restrictive Food Intake Disorder
6	8	UK	1	White British	Skin appearance, family history and genetic test	4	2	-		-
7	5	Usa	1	Black/white	Skin appearance, family history and genetic test	3	1	1		2
8	10	Japan	1	American	Skin appearance and family history		1	2		2
9	10	United states	1	Caucasian	Skin appearance, family history and biochemical test		3	2		1	ADHD at age 7
10	7	u.k.	3	white	Skin appearance and family history		2	1	Difficulties at school	1	Diagnosed with sensory processing disorder at 5. Awaiting paeditricians appointment in 2 weeks time
11	13	USA	2	Caucasian	-		1	2		2
12	7	U.K.	2	WHITE	Skin appearance and family history		2	-		-
13	10	u.k.	1	WHITE	Skin appearance and family history		1	-		2
14	13	Usa	1	European	Skin appearance and family history		1	2		1	Add
15	14	New Zealand	1	British born in Scotland	Skin appearance, family history and genetic test	3	2	1	Severe Dyslexia	1	My son is severely dyslexic and needs a lot of support at school and home. His reading and writing is well below his age level. Although he does not appear to be "slow" in any other areas and verbally he is fine. He is quite immature for his age though and just recently we have been referred to an endocrine specialist as he has pre pubtal levels of testosterone.
16	18	England	2	British	Skin appearance, family history and genetic test	2	3	1	Photographic memory	1	Autism, ADHD
17	18	us	2	-	Skin appearance, family history and genetic test	-	-	-		1	-
18	18	United States	1	Caucasian European	Skin appearance, family history and genetic test	1	2	-		1	Diagnosed Bipolar and OCD at age 5.
19	18	Usa	2	Western european	Skin appearance and family history		4	2		2
20	8	new zealand	1	European	Skin appearance and family history		1	1	Adhd	1	Adhd
21	10	Uk	2	British	Skin appearance, family history and genetic test	1	2	2		1	developmental disorder/no working memory, aspergers/autism , ADHD. Unable to learn to read and retain information, does not interact with other children. 7 years old.
22	6	Usa	1	Half Caucasian/half asian	Skin appearance and family history		1	1	Scoring consistently in the 99% for mathematics on m.a.p. Standardized tests, school guidance counselor suggests iq testing, g/t student	2
23	17	USA	1	WHITE	Skin appearance and family history		3	2		2
24	8	United states	2	White	Skin appearance, family history and genetic test	4	2	1	Autism, adhd, microdeletion of 16p 13.11	1	Diagnosed at age 4. ASD, ADHD, odd

## Sheet: Sensory information
	Q42_1	Q42_2	Q42_3	Q42_4	Q42_5
Participant number	How would your son rate each of his senses? -Vision	How would your son rate each of his senses? -Hearing	How would your son rate each of his senses? -Taste	How would your son rate each of his senses? -Smell	How would your son rate each of his senses? -Touch
	1=excellent, 2=good, 3=average, 4=poor, 5=very poor
1	2	2	2	2	2
2	4	2	2	3	3
3	1	1	1	1	1
4	4	3	3	3	3
5	2	4	4	3	4
6	3	3	3	3	3
7	3	2	2	2	2
8	1	2	1	1	1
9	4	3	3	3	3
10	2	2	2	2	2
11	2	1	1	1	1
12	2	3	3	2	2
13	1	1	1	3	2
14	1	1	1	1	1
15	2	3	2	3	3
16	4	2	2	2	2
17	1	1	1	1	1
18	2	1	2	2	1
19	4	3	2	1	3
20	3	3	3	3	3
21	4	2	1	1	3
22	4	2	3	3	3
23	2	3	2	2	2
24	1	1	1	1	1
Median	2	2	2	2	2
Wilcoxon Signed Ranks Test p-value	p<0.05	p<0.005	p<0.001	p<0.001	p<0.005
(vs. average value of '3')

## Sheet: Adult ADHD Self-Report Scale
	Q48_1	Q48_2	Q48_3	Q48_4	Q48_5	Q48_6	Q48_7	Q48_8	Q48_9	Q48_10	Q48_11	Q48_12	Q48_13	Q48_14	Q48_15	Q48_16	Q48_17	Q48_18
	Attention and impulsivity 1: Please answer the questions below, rating your son on each of the cr...-1. How often does your son have trouble wrapping up the final details of a project, once the challenging parts have been done?	Attention and impulsivity 1: Please answer the questions below, rating your son on each of the cr...-2. How often does your son have difficulty getting things in order when he has to do a task that requires organization?	Attention and impulsivity 1: Please answer the questions below, rating your son on each of the cr...-3. How often does your son have problems remembering appointments or obligations?	Attention and impulsivity 1: Please answer the questions below, rating your son on each of the cr...-4. When your son has a task that requires a lot of thought, how often does he avoid or delay getting started?	Attention and impulsivity 1: Please answer the questions below, rating your son on each of the cr...-5. How often does your son fidget or squirm with his hands or feet when he have to sit down for a long time?	Attention and impulsivity 1: Please answer the questions below, rating your son on each of the cr...-6. How often does your son feel overly active and compelled to do things, like he was driven by a motor?	Attention and impulsivity 1: Please answer the questions below, rating your son on each of the cr...-7. How often does your son make careless mistakes when he has to work on a boring or difficult project?	Attention and impulsivity 1: Please answer the questions below, rating your son on each of the cr...-8. How often does your son have difficulty keeping his attention when he is doing boring or repetitive work?	Attention and impulsivity 1: Please answer the questions below, rating your son on each of the cr...-9. How often does your son have difficulty concentrating on what people have to say when they are speaking to him directly?	Attention and impulsivity 1: Please answer the questions below, rating your son on each of the cr...-10. How often does your son misplace or have difficulty finding things at home or at work?	Attention and impulsivity 1: Please answer the questions below, rating your son on each of the cr...-11. How often is your son distracted by activity or noise around him?	Attention and impulsivity 1: Please answer the questions below, rating your son on each of the cr...-12. How often does your son leave your seat in meetings or other situations in which he is expected to remain seated?	Attention and impulsivity 1: Please answer the questions below, rating your son on each of the cr...-13. How often does your son feel restless or fidgety?	Attention and impulsivity 1: Please answer the questions below, rating your son on each of the cr...-14. How often does your son have difficulty unwinding and relaxing when he has time to himself?	Attention and impulsivity 1: Please answer the questions below, rating your son on each of the cr...-15. How often does your son find himself talking too much when he is in social situations?	Attention and impulsivity 1: Please answer the questions below, rating your son on each of the cr...-16. When your son is in a conversation, how often does he find himself finishing the sentences of the people he are talking to, before they can finish them themselves?	Attention and impulsivity 1: Please answer the questions below, rating your son on each of the cr...-17. How often does your son have difficulty waiting their turn in situations when turn taking is required?	Attention and impulsivity 1: Please answer the questions below, rating your son on each of the cr...-18 How often does your son interrupt others when they are busy?
	Score: 0=never, 1=rarely, 2=sometimes, 3=often, 4=Very often								Symptom count
Participant number	Red	Imputed values																		Total score Section A	Inattention score A	Hyp-Imp score A	Total score Section B	Inattention score B	Hyp-Imp score B	Total score A+B	Inattention score A+B	Hyp-Imp score A+B	Symptom count A (max. 6)	Possible ADHD?	Symptom count B (max. 12)	Total symptom count A+B (max. 18)	Inattentive symptom count A+B (max. 9)	Hyperactive-impulsive symptom count A+B (max. 9)
2	2	2	2	2	4	3	4	4	2	3	4	2	4	3	1	1	3	4		15	8	7	35	17	18	50	25	25	5	Yes	10	15	8	7
3	4	4	3	3	4	4	3	4	4	2	4	4	4	4	4	2	4	4		22	14	8	43	17	26	65	31	34	6	Yes	11	17	8	9
4	3	3	2	4	4	4	4	4	3	4	3	4	4	3	3	3	3	3		20	12	8	41	18	23	61	30	31	6	Yes	12	18	9	9
5	4	4	4	4	4	3	4	4	3	4	4	2	3	4	2	1	4	3		23	16	7	38	19	19	61	35	26	6	Yes	10	16	9	7
6	2.66667	2	2.38889	3	3	3	3.16667	3	2	2.55556	3	2	3	3	1	1.66667	2	2.77778		16.0556	10.0556	6	29.1667	13.7222	15.4444	45.2222	23.7778	21.4444	6	Yes	9	15	9	6
7	3	1	2	3	3	2	3	3	1	1	2	0	3	1	1	0	0	2		14	9	5	17	10	7	31	19	12	4	Yes	4	8	5	3
8	2	2	2	3	3	2	3	3	2	3	2	1	3	2	2	2	1	1		14	9	5	25	13	12	39	22	17	5	Yes	6	11	8	3
11	2	1	1	2	2	1	3	3	2	1	1	0	1	0	3	1	0	2		9	6	3	17	10	7	26	16	10	1		5	6	4	2
12	2	3	3	3	4	4	4	4	4	3	4	4	4	3	2	0	4	4		19	11	8	40	19	21	59	30	29	6	Yes	10	16	9	7
13	4	3	3	4	1	0	3	3	2	3	2	1	2	2	3	2	2	3		15	14	1	28	13	15	43	27	16	4	Yes	7	11	8	3
14	3	4	3	2	4	4	4	4	2	2	4	2	4	3	3	2	2	1		20	12	8	33	16	17	53	28	25	5	Yes	9	14	7	7
15	2	4	2	4	1	0	3	3	2	2	4	0	1	0	1	0	0	3		13	12	1	19	14	5	32	26	6	4	Yes	5	9	8	3
16	3	3	3	4	4	4	4	4	3	3	3	4	4	3	4	3	3	4		21	13	8	42	17	25	63	30	33	6	Yes	12	18	9	9
18	1	1	1	2	1	3	1	3	1	1	2	2	3	1	2	3	2	3		9	5	4	24	8	16	33	13	20	1		5	6	1	5
20	3	3	2	2	4	4	3	3	2	2	4	2	3	3	3	3	3	4		18	10	8	35	14	21	53	24	29	5	Yes	11	16	7	9
21	4	4	4	4	4	4	4	4	4	4	4	4	4	4	0	0	4	2		24	16	8	38	20	18	62	36	26	6	Yes	10	16	9	7
22	1	1	1	1	2	1	1	1	1	2	3	1	1	1	1	2	1	2		7	4	3	17	8	9	24	12	12	0		3	3	1	2
23	1	1	1	1	3	1	2	2	1	2	3	1	3	1	1	1	1	1		8	4	4	19	10	9	27	14	13	1		2	3	1	2
24	4	4	4	4	4	4	4	4	4	4	4	4	4	4	4	4	4	4		24	16	8	48	20	28	72	36	36	6	Yes	12	18	9	9
																				Total Section A	Inattention A	Hyp-Imp A	Total Section B	Inattention B	Hyp-Imp B	Total A+B	Inattention A+B	Hyp-Imp A+B	Symptom count A	Possible ADHD?	Symptom count B (max. 12)	Total symptom count A+B (max. 18)	Inattentive symptom count A+B (max. 9)	Hyperactive-impulsive symptom count A+B (max. 9)
																			Mean	16.3713	10.5819	5.78947	30.9561	14.5643	16.3918	47.3275	25.1462	22.1813	4.36842		8.05263	12.4211	6.78947	5.73684
																			SE	1.25933	0.896012	0.570108	2.32097	0.912913	1.56477	3.49399	1.73466	2.04888	0.472709	17 out of 22	0.751115	1.18053	0.669201	0.625212
																														0.77
																										41.3333	25	16.3333	4.66667		7	11.6667
																										9.83757	3.21455	7.5351	0.666667		2.51661	3.1798

## Sheet: BIS-11
		Q49_1	Q49_2	Q49_3	Q49_4	Q49_5	Q49_6	Q49_7	Q49_8	Q49_9	Q49_10	Q49_11	Q49_12	Q49_13	Q49_14	Q49_15	Q49_16	Q49_17	Q49_18	Q49_19	Q49_20	Q49_21	Q49_22	Q49_23	Q49_24	Q49_25	Q49_26	Q49_27	Q49_28	Q49_29	Q49_30
		Attention and impulsivity 2: People differ in the ways they act and think in different situations...-1. Your son plans tasks carefully	Attention and impulsivity 2: People differ in the ways they act and think in different situations...-2. Your son does things without thinking	Attention and impulsivity 2: People differ in the ways they act and think in different situations...-3. Your son makes-up their mind quickly	Attention and impulsivity 2: People differ in the ways they act and think in different situations...-4. Your son is happy-go-lucky	Attention and impulsivity 2: People differ in the ways they act and think in different situations...-5. Your son doesn't â€œpay attention.â€	Attention and impulsivity 2: People differ in the ways they act and think in different situations...-6. Your son has â€œracingâ€ thoughts.	Attention and impulsivity 2: People differ in the ways they act and think in different situations...-7. Your son plan trips well ahead of time.	Attention and impulsivity 2: People differ in the ways they act and think in different situations...-8. Your son is self controlled.	Attention and impulsivity 2: People differ in the ways they act and think in different situations...-9.Your son can concentrate easily.	Attention and impulsivity 2: People differ in the ways they act and think in different situations...-10. Your son saves regularly	Attention and impulsivity 2: People differ in the ways they act and think in different situations...-11. Your son â€œsquirmsâ€ at plays or lectures.	Attention and impulsivity 2: People differ in the ways they act and think in different situations...-12. Your son is a careful thinker.	Attention and impulsivity 2: People differ in the ways they act and think in different situations...-13. Your son has plan for job security.	Attention and impulsivity 2: People differ in the ways they act and think in different situations...-14. Your son say things without thinking	Attention and impulsivity 2: People differ in the ways they act and think in different situations...-15. Your son likes to think about complex problems.	Attention and impulsivity 2: People differ in the ways they act and think in different situations...-16. Your son changes jobs.	Attention and impulsivity 2: People differ in the ways they act and think in different situations...-17. Your son acts â€œon impulse.â€	Attention and impulsivity 2: People differ in the ways they act and think in different situations...-18. Your son gets easily bored when solving thought problems.	Attention and impulsivity 2: People differ in the ways they act and think in different situations...-19. Your son acts on the spur of the moment.	Attention and impulsivity 2: People differ in the ways they act and think in different situations...-20. Your son is a steady thinker.	Attention and impulsivity 2: People differ in the ways they act and think in different situations...-21. Your son change residences.	Attention and impulsivity 2: People differ in the ways they act and think in different situations...-22. Your son buys things on impulse.	Attention and impulsivity 2: People differ in the ways they act and think in different situations...-23 Your son can only think about one thing at a time.	Attention and impulsivity 2: People differ in the ways they act and think in different situations...-24. Your son changes hobbies.	Attention and impulsivity 2: People differ in the ways they act and think in different situations...-25. Your son spends or charges more than they earn.	Attention and impulsivity 2: People differ in the ways they act and think in different situations...-26. Your son often has extraneous thoughts when thinking.	Attention and impulsivity 2: People differ in the ways they act and think in different situations...-27. Your son is more interested in the present than the future.	Attention and impulsivity 2: People differ in the ways they act and think in different situations...-28. Your son is restless at the theater or lectures.	Attention and impulsivity 2: People differ in the ways they act and think in different situations...-29. Your son likes puzzles.	Attention and impulsivity 2: People differ in the ways they act and think in different situations...-30. Your son is future oriented.
																																		2nd order factors			1st order factors
Participant number					Reverse scored			Red=imputed scores																									Total score	Attentional	Motor	Non-planning	Attention	Cognitive instability	Motor	Perseverance	Self control	Cognitive complexity
2	RESPONSE	2	3	4	2	4	3	1	2	3	4	4	2	2	3	4	3	3	3	3	2	2	3	3	1	1	2	3	4	2	2
	SCORE	3	3	4	2	4	3	4	3	2	1	4	3	3	3	1	3	3	3	3	3	2	3	3	1	1	2	3	4	3	3		83	23	30	30	17	6	19	11	19	11
3	RESPONSE	1	4	2	4	4	4	1	1	1	2	4	1	1	4	1	1	4	4	4	1	1	4	2	3	1	1	4	4	2	1
	SCORE	4	4	2	4	4	4	4	4	4	3	4	4	4	4	4	1	4	4	4	4	1	4	2	3	1	1	4	4	3	4		101	28	31	42	20	8	23	8	24	18
4	RESPONSE	2	3	3	3	3	3	1	2	2	1	3	1	1	3	1	2	3	4	4	2	1	1	3	3	2	3	3	4	3	2
	SCORE	3	3	3	3	3	3	4	3	3	4	3	4	4	3	4	2	3	4	4	3	1	1	3	3	2	3	3	4	2	3		91	25	28	38	16	9	19	9	21	17
5	RESPONSE	1	4	1	1	4	4	1	3	2	1	4	1	2	4	1	4	4	4	4	2	1	3	4	1	1	3	4	4	2	2
	SCORE	4	4	1	1	4	4	4	2	3	4	4	4	3	4	4	4	4	4	4	3	1	3	4	1	1	3	4	4	3	3		96	26	30	40	18	8	18	12	21	19
7	RESPONSE	2	2	3	2	2	2	1	3	2	1	1	2	1	1	3	missing	1	3	1	2	missing	2	1	2	2	2	2	2	3	2
	SCORE	3	2	3	2	2	2	4	2	3	4	1	3	4	1	2	1.66667	1	3	1	3	1.1	2	1	2	2	2	2	2	2	3		66.7667	17	19.7667	30	11	6	13	6.76667	17	13
8	RESPONSE	2	3	2	4	2	1	2	3	2	2	1	2	2	2	2	1	1	2	2	2	1	1	3	3	1	2	2	2	2	2
	SCORE	3	3	2	4	2	1	3	2	3	3	1	3	3	2	3	1	1	2	2	3	1	1	3	3	1	2	2	2	3	3		68	17	22	29	11	6	14	8	16	13
11	RESPONSE	3	1	3	3	2	1	1	3	2	3	2	3	missing	3	4	missing	3	1	2	4	missing	missing	2	2	missing	3	2	1	4	missing
	SCORE	2	1	3	3	2	1	3	2	3	2	2	2	3.61538	3	1	1.66667	3	1	2	1	1.1	2.17647	2	2	1.57143	3	2	1	1	3.22222		61.3522	15	23.7368	22.6154	9	6	15.7479	7.98889	15.6154	7
12	RESPONSE	2	4	2	2	4	4	1	1	2	2	4	1	missing	4	2	missing	4	4	4	2	missing	2	4	2	missing	3	3	4	2	1
	SCORE	3	4	2	2	4	4	4	4	3	3	4	4	3.61538	4	3	1.66667	4	4	4	3	1.1	2	4	2	1.57143	3	3	4	3	4		95.9535	27	30.3381	38.6154	18	9	19.5714	10.7667	22.6154	16
13	RESPONSE	1	2	2	3	3	missing	3	2	2	1	1	2	missing	3	1	missing	2	4	2	2	missing	4	3	3	4	3	3	1	1	2
	SCORE	4	2	2	3	3	2.6875	2	3	3	4	1	3	3.61538	3	4	1.66667	2	4	2	3	1.1	4	3	3	4	3	3	1	4	3		86	19.6875	27.7667	37.6154	11	8.6875	19	8.76667	18.6154	19
14	RESPONSE	2	4	2	2	3	4	1	2	1	3	4	2	missing	3	2	missing	3	3	3	2	missing	2	missing	1	missing	4	3	3	1	1
	SCORE	3	4	2	2	3	4	4	3	4	2	4	3	3.61538	3	3	1.66667	3	3	3	3	1.1	2	2.9375	1	1.57143	4	3	3	4	4		87.891	26	27.2756	34.6154	17	9	17.5714	9.70417	19.6154	15
15	RESPONSE	1	2	1	2	2	1	1	3	1	4	1	3	1	2	1	1	2	3	2	3	missing	1	4	1	1	1	4	1	4	1
	SCORE	4	2	1	2	2	1	4	2	4	1	1	2	4	2	4	1	2	3	2	2	1.1	1	4	1	1	1	4	1	1	4		65.1	13	21.1	31	10	3	11	10.1	18	13
16	RESPONSE	1	4	1	2	3	3	1	1	1	2	3	1	1	3	3	3	3	3	3	1	1	2	4	1	2	4	4	3	1	1
	SCORE	4	4	1	2	3	3	4	4	4	3	2	4	4	3	2	3	3	3	3	4	1	2	4	1	2	4	4	3	4	4		92	24	29	39	16	8	17	12	23	16
18	RESPONSE	3	2	2	3	2	1	4	4	2	4	1	4	3	2	1	1	2	2	1	3	1	1	2	1	1	1	1	1	2	4
	SCORE	2	2	2	3	2	1	1	1	3	1	1	1	2	2	4	1	2	2	1	2	1	1	2	1	1	1	1	1	3	1		49	12	17	20	9	3	12	5	9	11
20	RESPONSE	2	3	3	2	3	3	3	2	2	1	4	2	missing	3	2	missing	3	2	3	1	missing	2	3	3	missing	3	3	missing	missing	missing
	SCORE	3	3	3	2	3	3	2	3	3	4	4	3	3.61538	3	3	1.66667	3	2	3	4	1.1	2	3	3	1.57143	3	3	2.7	2.75	3.22222		84.6257	25.7	26.5603	32.3654	16.7	9	17.5714	8.98889	17.6154	14.75
21	RESPONSE	1	4	4	4	1	4	1	1	1	2	4	1	missing	4	1	missing	4	4	4	1	missing	missing	4	1	missing	3	2	4	1	1
	SCORE	4	4	4	4	1	4	4	4	4	3	4	4	3.61538	4	4	1.66667	4	4	4	4	1.1	2.17647	4	1	1.57143	3	2	4	4	4		100.13	25	34.5146	40.6154	17	8	23.7479	10.7667	23.6154	17
22	RESPONSE	2	3	4	3	1	1	2	2	4	3	2	2	1	2	3	1	2	2	2	4	1	1	1	2	1	1	3	1	4	2
	SCORE	3	3	4	3	1	1	3	3	1	2	2	3	4	2	2	1	2	2	2	1	1	1	1	2	1	1	3	1	1	3		60	10	22	28	6	4	16	6	18	10
24	RESPONSE	1	4	4	3	4	4	1	1	1	1	4	1	1	4	3	1	4	4	4	1	1	4	4	4	1	1	3	4	2	1
	SCORE	4	4	4	3	4	4	4	4	4	4	4	4	4	4	2	1	4	4	4	4	1	4	4	4	1	1	3	4	3	4		103	29	34	40	20	9	24	10	24	16
17																																Mean	81.8129	21.3169	26.7093	33.7319	14.2765	7.04044	17.6006	9.10874	19.276	14.4559
																																SE	4.0554	1.48535	1.21693	1.58645	1.05369	0.513852	0.926003	0.484357	0.93143	0.813556
																																SD	16.7209	6.12426	5.01754	6.54109	4.34447	2.11866	3.81801	1.99706	3.84039	3.35438

## Sheet: Autism Quotient
		Q22_1	Q22_2	Q22_3	Q22_4	Q22_5	Q22_6	Q22_7	Q22_8	Q22_9	Q22_10	Q22_11	Q22_12	Q22_13	Q22_14	Q22_15	Q22_16	Q22_17	Q22_18	Q22_19	Q22_20	Q22_21	Q22_22	Q22_23	Q22_24	Q22_25	Q22_26	Q22_27	Q22_28	Q22_29	Q22_30	Q22_31	Q22_32	Q22_33	Q22_34	Q22_35	Q22_36	Q22_37	Q22_38	Q22_39	Q22_40	Q22_41	Q22_42	Q22_43	Q22_44	Q22_45	Q22_46	Q22_47	Q22_48
		Social interactions and general behaviour -1. I prefer to do things with others rather than on my own.	Social interactions and general behaviour -2. I prefer to do things the same way over and over again.	Social interactions and general behaviour -3. If I try to imagine something, I find it very easy to create a picture in my mind.	Social interactions and general behaviour -4. I frequently get so strongly absorbed in one thing that I lose sight of other things.	Social interactions and general behaviour -5. I often notice small sounds when others do not.	Social interactions and general behaviour -6. I usually notice car number plates or similar strings of information.	Social interactions and general behaviour -7. Other people frequently tell me that what Iâ€™ve said is impolite, even though I think it is polite.	Social interactions and general behaviour -8. When Iâ€™m reading a story, I can easily imagine what the characters might look like.	Social interactions and general behaviour -9. I am fascinated by dates	Social interactions and general behaviour -10. In a social group, I can easily keep track of several different peopleâ€™s conversations.	Social interactions and general behaviour -11. I find social situations easy.	Social interactions and general behaviour -12. I tend to notice details that others do not.	Social interactions and general behaviour -13. I would rather go to a library than a party.	Social interactions and general behaviour -14. I find making up stories easy.	Social interactions and general behaviour -15. I find myself drawn more strongly to people than to things.	Social interactions and general behaviour -16. I tend to have very strong interests, which I get upset about if I canâ€™t pursue.	Social interactions and general behaviour -17. I enjoy social chit-chat.	Social interactions and general behaviour -18. When I talk, it isnâ€™t always easy for others to get a word in edgeways.	Social interactions and general behaviour -19. I am fascinated by numbers.	Social interactions and general behaviour -20. When Iâ€™m reading a story, I find it difficult to work out the charactersâ€™ intentions.	Social interactions and general behaviour -21. I donâ€™t particularly enjoy reading fiction.	Social interactions and general behaviour -22. I find it hard to make new friends.	Social interactions and general behaviour -23. I notice patterns in things all the time.	Social interactions and general behaviour -24. I would rather go to the theatre than a museum.	Social interactions and general behaviour -25. It does not upset me if my daily routine is disturbed.	Social interactions and general behaviour -26. I frequently find that I donâ€™t know how to keep a conversation going.	Social interactions and general behaviour -27. I find it easy to â€œread between the linesâ€ when someone is talking to me.	Social interactions and general behaviour -28. I usually concentrate more on the whole picture, rather than the small details.	Social interactions and general behaviour -29. I am not very good at remembering phone numbers.	Social interactions and general behaviour -30. I don't usually notice small changes in a situation, or a person's appearance.	Social interactions and general behaviour -31. I know how to tell if someone listening to me is getting bored.	Social interactions and general behaviour -32. I find it easy to do more than one thing at a time.	Social interactions and general behaviour -33. When I talk on the phone, Iâ€™m not sure when itâ€™s my turn to speak.	Social interactions and general behaviour -34. I enjoy doing things spontaneously.	Social interactions and general behaviour -35. I am often the last to understand the point of a joke.	Social interactions and general behaviour -36. I find it easy to work out what someone is thinking or feeling just by at their face.	Social interactions and general behaviour -37. If there is an interruption, I can switch back to what I was doing very quickly.	Social interactions and general behaviour -38. I am good at social chit-chat.	Social interactions and general behaviour -39. People often tell me that I keep going on and on about the same thing.	Social interactions and general behaviour -40. When I was young, I used to enjoy playing games involving pretending with other children.	Social interactions and general behaviour -41. I like to collect information about categories of things (e.g. types of car, types of bird, types of train, types of plant, etc.).	Social interactions and general behaviour -42. I find it difficult to imagine what it would be like to be someone else.	Social interactions and general behaviour -43. I like to plan any activities I participate in carefully.	Social interactions and general behaviour -44. I enjoy social occasions.	Social interactions and general behaviour -45. I find it difficult to work out peopleâ€™s intentions.	Social interactions and general behaviour -46. New situations make me anxious.	Social interactions and general behaviour -47. I enjoy meeting new people.	Social interactions and general behaviour -48. I am a good diplomat.
Participant number
		Red text: score 1 point if repsonse is 3 or 4	Score 1 point if response is 3 or 4				Black text: score 1 point if response is 1 or 2					Missing=missing response/imputed score
	RESPONSE	4	2	2	1	1	3	1	2	3	4	3	2	3	1	4	1	4	3	missing	3	3	3	1	4	3	2	4	4	2	3	4	3	1	2	3	3	2	4	3	3	1	3	3	2	3	4	3	4
2	SCORE	1	1	0	1	1	0	1	0	0	1	1	1	0	0	1	1	1	0	0.53125	0	0	0	1	1	1	1	1	1	0	1	1	1	1	0	0	1	0	1	0	1	1	0	0	0	0	0	1	1
	RESPONSE	1	3	2	1	1	3	2	1	3	4	1	3	4	1	1	1	1	1	4	3	2	4	3	2	1	4	3	2	1	2	4	4	1	1	3	3	3	1	1	1	2	4	4	1	3	4	1	2
3	SCORE	0	0	0	1	1	0	1	0	0	1	0	0	0	0	0	1	0	1	0	0	1	0	0	0	0	0	1	0	0	0	1	1	1	0	0	1	1	0	1	0	1	0	0	0	0	0	0	0
	RESPONSE	2	2	3	2	2	2	3	2	3	2	3	1	3	3	2	1	2	3	4	3	4	3	2	2	3	2	2	4	2	4	2	3	4	2	3	2	3	3	3	3	3	2	4	2	2	2	3	3
4	SCORE	0	1	1	1	1	1	0	0	0	0	1	1	0	1	0	1	0	0	0	0	0	0	1	0	1	1	0	1	0	1	0	1	0	0	0	0	1	1	0	1	0	1	0	0	1	1	1	1
	RESPONSE	4	1	4	1	1	1	1	4	4	4	4	1	3	3	1	1	3	4	2	1	1	1	3	4	4	1	4	3	2	4	4	4	2	2	1	4	4	3	1	4	1	1	2	4	1	1	4	3
5	SCORE	1	1	1	1	1	1	1	1	0	1	1	1	0	1	0	1	1	0	1	1	1	1	0	1	1	1	1	1	0	1	1	1	1	0	1	1	1	1	1	1	1	1	1	1	1	1	1	1
	RESPONSE	3	missing	3	missing	2	4	missing	missing	missing	4	4	missing	missing	missing	4	missing	4	missing	4	2	1	1	missing	missing	2	2	4	missing	missing	missing	missing	3	missing	missing	4	missing	missing	1	missing	4	missing	missing	missing	3	missing	1	4	missing
6	SCORE	1	0.70588	1	1	1	0	0.625	0.25	0.2	1	1	0.76471	0.05882	0.47059	1	0.8125	1	0.64706	0	1	1	1	0.6875	0.29412	0	1	1	0.75	0.58824	0.5625	0.625	1	0.52941	0.29412	0	0.47059	0.58824	0	0.5625	1	0.64706	0.53333	0.25	1	0.625	1	1	0.42857
	RESPONSE	2	3	1	2	2	3	4	1	missing	3	3	2	4	2	missing	1	1	4	2	4	4	3	2	1	2	3	2	2	2	3	2	2	3	3	4	2	2	2	4	2	2	3	3	2	3	3	3	2
7	SCORE	0	0	0	1	1	0	1	0	0.2	1	1	1	0	0	0.5625	1	0	0	1	0	0	0	1	0	0	0	0	0	0	1	0	0	0	1	0	0	0	0	0	0	1	0	0	0	0	0	1	0
	RESPONSE	2	2	2	1	4	2	3	1	2	3	2	2	3	2	2	2	1	1	1	3	2	2	2	1	2	3	2	2	2	2	2	3	3	2	3	2	2	1	2	1	2	2	2	1	3	3	1	1
8	SCORE	0	1	0	1	0	1	0	0	1	1	0	1	0	0	0	1	0	1	1	0	1	1	1	0	0	0	0	0	0	0	0	1	0	0	0	0	0	0	1	0	1	1	1	0	0	0	0	0
	RESPONSE	1	4	1	1	3	missing	4	1	4	2	1	2	4	3	3	2	1	2	3	3	4	3	2	3	2	3	missing	3	1	1	2	3	3	2	3	1	2	1	2	4	2	3	missing	1	3	3	1	2
11	SCORE	0	0	0	1	0	0.5625	0	0	0	0	0	1	0	1	1	1	0	1	0	0	0	0	1	1	0	0	0.64706	1	0	0	0	1	0	0	0	0	0	0	1	1	1	0	0.25	0	0	0	0	0
	RESPONSE	2	3	2	1	2	missing	1	2	4	3	4	3	3	3	3	1	2	3	2	2	3	1	3	missing	2	1	4	3	4	1	3	4	2	1	1	4	4	4	3	2	3	2	4	2	1	2	4	4
12	SCORE	0	0	0	1	1	0.5625	1	0	0	1	1	0	0	1	1	1	0	0	1	1	0	1	0	0.29412	0	1	1	1	1	0	1	1	1	0	1	1	1	1	0	0	0	1	0	0	1	1	1	1
	RESPONSE	4	3	1	1	3	4	3	1	4	1	2	3	3	3	2	1	1	2	4	3	3	4	4	3	2	4	1	3	2	3	4	4	3	2	3	2	3	1	1	4	3	2	4	2	3	2	2	2
13	SCORE	1	0	0	1	0	0	0	0	0	0	0	0	0	1	0	1	0	1	0	0	0	0	0	0	0	0	0	1	0	1	1	1	0	0	0	0	1	0	1	1	0	1	0	0	0	1	0	0
	RESPONSE	2	2	4	2	1	1	2	3	3	1	2	1	4	3	2	3	2	2	1	3	2	4	2	1	3	3	2	3	missing	4	missing	2	4	3	4	2	3	3	4	4	2	missing	3	2	missing	1	3	missing
14	SCORE	0	1	1	1	1	1	1	1	0	0	0	1	0	1	0	0	0	1	1	0	1	0	1	0	1	0	0	1	0.58824	1	0.625	0	0	1	0	0	1	1	0	1	1	0.53333	0	0	0.625	1	1	0.42857
	RESPONSE	2	1	1	1	1	3	4	1	4	4	2	1	4	1	3	3	2	3	4	3	4	4	2	1	3	2	2	1	1	1	1	4	2	2	2	1	4	2	3	1	4	3	4	1	2	2	2	1
15	SCORE	0	1	0	1	1	0	0	0	0	1	0	1	0	0	1	0	0	0	0	0	0	0	1	0	1	1	0	0	0	0	0	1	1	0	1	0	1	0	0	0	0	0	0	0	1	1	0	0
	RESPONSE	4	1	2	1	1	1	1	2	3	4	4	1	1	2	4	1	4	1	4	1	1	1	2	4	4	1	4	4	3	3	3	4	1	4	1	4	2	4	1	4	1	1	3	4	1	1	4	3
16	SCORE	1	1	0	1	1	1	1	0	0	1	1	1	1	0	1	1	1	1	0	1	1	1	1	1	1	1	1	1	1	1	1	1	1	1	1	1	0	1	1	1	1	1	0	1	1	1	1	1
	RESPONSE	4	2	missing	1	1	2	2	missing	missing	missing	1	1	4	2	missing	1	2	1	missing	missing	4	4	missing	2	3	missing	4	missing	3	missing	3	3	1	3	2	2	4	3	1	1	3	missing	2	2	1	2	2	missing
20	SCORE	1	1	0.29492	1	1	1	1	0.25	0.2	0.70588	0	1	0	0	0.5625	1	0	1	0.5	0.330883	0	0	0.6875	0	1	0.58824	1	0.75	1	0.5625	1	1	1	1	1	0	1	1	1	0	0	0.53333	1	0	1	1	0	0.42857
	RESPONSE	4	1	4	1	1	1	2	4	4	4	4	1	4	4	4	1	4	1	1	missing	missing	1	1	missing	4	1	4	4	missing	1	4	4	1	4	1	4	4	4	1	4	1	1	4	4	1	1	4	missing
21	SCORE	1	1	1	1	1	1	1	1	0	1	1	1	0	1	1	1	1	1	1	0.29412	0.41176	1	1	0.29412	1	1	1	1	0.58824	0	1	1	1	1	1	1	1	1	1	1	1	1	0	1	1	1	1	0.42857
	RESPONSE	2	2	1	1	2	1	4	1	2	3	2	1	3	1	2	1	3	1	1	4	4	3	1	1	1	3	4	4	4	1	4	4	3	1	1	2	1	3	3	1	1	4	2	1	1	2	2	2
22	SCORE	0	1	0	1	1	1	0	0	1	1	0	1	0	0	0	1	1	1	1	0	0	0	1	0	0	0	1	1	1	0	1	1	0	0	1	0	0	1	0	0	1	0	1	0	1	1	0	0
	RESPONSE	2	2	2	2	1	1	1	3	1	3	4	2	3	3	3	2	3	1	2	2	2	2	2	3	4	1	4	3	3	4	4	3	2	2	1	4	4	4	1	2	2	3	3	3	1	2	2	3
24	SCORE	0	1	0	1	1	1	1	1	1	1	1	1	0	1	1	0	1	1	1	1	1	1	1	1	1	1	1	1	1	1	1	1	1	0	1	1	1	1	1	0	1	0	0	1	1	1	0	1
17
[truncated: 8 more columns]

## Sheet: Kessler Psych Distress K6
K6	Q51_2	Q51_4	Q51_5	Q51_8	Q51_9	Q51_10
	Mood and feelings: These questions concern how your son has been feeling over the past 30 days.-2. During the last 30 days, about how often did your son feel nervous?	Mood and feelings: These questions concern how your son has been feeling over the past 30 days.-4. During the last 30 days, about how often did your son feel hopeless?	Mood and feelings: These questions concern how your son has been feeling over the past 30 days.-5. During the last 30 days, about how often did your son feel restless or fidgety?	Mood and feelings: These questions concern how your son has been feeling over the past 30 days.-8. During the last 30 days, about how often did your son feel that everything was an effort?	Mood and feelings: These questions concern how your son has been feeling over the past 30 days.-9. During the last 30 days, about how often did your son feel so sad that nothing could cheer him up?	Mood and feelings: These questions concern how your son has been feeling over the past 30 days.-10. During the last 30 days, about how often did your son feel worthless?
Participant number	Scores between 0-24
	Red=imputed values
							Total
2	1	1	3	1	0	0	6
3	0	0	4	2	0	0	6
4	2	0	1	1	1	0	5
5	3	3	3	4	2	2	17
6	3	2	2	1.4375	0.5625	0.5	9.5
7	0	0	1	0	0	0	1
8	0	0	1	0	0	0	1
11	2	0	0	0	0	0	2
12	2	2	4	1	2	3	14
13	3	2	1	3	1	1	11
14	1	0	3	2	0	0	6
15	1	0	0	3	1	0	5
16	3	1	3	2	0	0	9
20	2	0	3	0	0	0	5
21	1	0	3	0	0	0	4
22	1	0	0	1	0	0	2
24	4	3	4	3	2	2	18			3/17 subjects scored 13 or greater
						Mean	7.14706
						SE	1.27459
						SD	5.25525

## Sheet: Disruptive Behaviour Disorder
	Q24_1	Q24_2	Q24_3	Q24_4	Q24_5	Q24_6	Q24_7	Q24_8	Q24_9	Q24_10	Q24_11	Q24_12	Q24_13	Q24_14	Q24_15	Q24_16	Q24_17	Q24_18	Q24_19	Q24_20	Q24_21	Q24_22	Q24_23	Q24_24	Q24_25	Q24_26	Q24_27	Q24_28	Q24_29	Q24_30	Q24_31	Q24_32	Q24_33	Q24_34	Q24_35	Q24_36	Q24_37	Q24_38	Q24_39	Q24_40	Q24_41	Q24_42	Q24_43	Q24_44	Q24_45
	Disorderly behaviour -1. You often interrupt or intrude on others (e.g., butt into conversations or games)	Disorderly behaviour -2. You have often run away from home overnight at least twice when living in parental or parental surrogate home often (or once without returning for a lengthy period	Disorderly behaviour -3. You often argue with adults	Disorderly behaviour -4. You often lie to obtain goods or favors or to avoid obligations (i.e., "cons" others)	Disorderly behaviour -5. You often initiate physical fights with other members of his or her household	Disorderly behaviour -6. You have been physically cruel to people	Disorderly behaviour -7. You often talk excessively	Disorderly behaviour -8. You have stolen items of non-trivial value without confronting a victim (g., shoplifting, but without breaking and entering; forgery)	Disorderly behaviour -9. You are often easily distracted by extraneous stimuli	Disorderly behaviour -10. You have often engaged in physically difficult activities without considering possible consequences (e.g. running into the middle of the road without thinking)	Disorderly behaviour -11. You were often a truant at school, staring from 13 years of age onwards	Disorderly behaviour -12. You often fidget with hands or feet or squirms in your seat	Disorderly behaviour -13. You are often spiteful or vindictive	Disorderly behaviour -14. You often swear or use obscene language	Disorderly behaviour -15. You often blames others for their mistakes or misbehavior	Disorderly behaviour -16. You have deliberately destroyed others' property (other than by fire setting)	Disorderly behaviour -17. You often actively defy or refuse to comply with adults' requests or rules	Disorderly behaviour -18. You often do not seem to listen when spoken to directly	Disorderly behaviour -19. You often blurt out answers before questions have been completed	Disorderly behaviour -20. You often initiate physical fights with others who do not live in your household	Disorderly behaviour -21. You often shift fro one uncompleted idea to another	Disorderly behaviour -22. You have difficulty playing or engaging in leisure activities quietly	Disorderly behaviour -23. You often fail to give close attention to details or make careless mistakes in work, or other activities	Disorderly behaviour -24. You are often angry and resentful	Disorderly behaviour -25. You often leave seat in situations in which remaining seated is expected	Disorderly behaviour -26. You are often touchy or easily annoyed by others	Disorderly behaviour -27. You often do not follow through on instructions and fail to finish hobbys, or duties in the workplace (not due to oppositional behavior or failure to understand instructions)	Disorderly behaviour -28. You often lose your temper	Disorderly behaviour -29. You often have difficulty sustaining attention in tasks or play activities	Disorderly behaviour -30. You often have difficulty awaiting turn	Disorderly behaviour -31. You have forced someone into sexual activity	Disorderly behaviour -32. You often bully, threaten, or intimidate others	Disorderly behaviour -33. You are often "on the go" or often act as if "driven by a motor"	Disorderly behaviour -34. You often lose things necessary for tasks or activities (e.g. books, or tools)	Disorderly behaviour -35. You often run about or climb excessively in situations in which it is inappropriate (in adolescents or adults, may be subject to feelings of restlessness)	Disorderly behaviour -36. You have been physically cruel to animals	Disorderly behaviour -37. You often avoid or dislike or are reluctant to engage in tasks that required sustained mental effort	Disorderly behaviour -38. You often stayed out at night despite parental prohibitions before the age of 13	Disorderly behaviour -39. You often deliberately annoy people	Disorderly behaviour -40. You have stolen while confronting a victim (e.g. mugging, purse-snatching)	Disorderly behaviour -41. You have deliberately engaged in fire setting with the intention of causing serious damage	Disorderly behaviour -42. You often have difficulty organizing tasks and activities	Disorderly behaviour -43. You have broken into somebody else's house, building or car	Disorderly behaviour -44. You are often forgetful in daily activities	Disorderly behaviour -45. You have used a weapon that can cause serious harm to others (e.g. bat, brick, broken bottle, knife)
																																															ADHD inattention symptoms (max. 9)	Mean inattention score	Total inattention score
Participant number	0=not at all, 1=just a little, 2=pretty much, 3=very much						Red=imputed values
2	3	0	1	1	2	1	0	0	1	1	0	3	1	0	1	1	0	2	2	0	2	1	2	1	0	1	2	1	1	2	0	1	2	2	1	0	1	0	1	0	0	0	0	2	0		5	1.44444	13
3	3	0	3	3	2	0	3	0	3	3	0	3	0	0	3	0	2	2	2	0	2	3	3	0	2	0	3	1	3	3	0	0	3	2	1	0	3	0	1	0	0	1	0	2	0		8	2.44444	22
4	1	0	2	1	1	0	0	0	1	0	0	1	1	0	2	0	0	1	0	0	1	0	1	2	0	2	1	2	1	1	0	0	0	1	0	0	0	0	0	0	0	1	0	1	0		0	0.888889	8
5	3	0	3	3	3	1	2	3	3	2	0	2	0	3	3	1	3	3	3	1	3	3	3	3	2	3	3	3	3	3	0	0	2	3	3	0	3	0	2	0	0	3	0	3	0		9	3	27
6	1	0	0	1	1.0625	0	0	1	1.75	0	0	2	0	0.8125	2	0.52941	1	1	0	0	1.47059	1	2	2	0	1	2	1	1	0	0	0	1	1	1	0	2	0	1.05882	0	0	1.64706	0	1.88235	0		6	1.5866	14.2794
7	0	0	0	1	1	0	0	0	1	0	0	1	0	1	0	0	0	0	1	0	0	0	2	0	0	1	1	0	0	0	0	0	0	1	0	0	1	0	0	0	0	1	0	1	0		1	0.888889	8
8	1	0	1	0	0	0	0	0	0	0	0	0	0	0	0	0	1	0	0	0	1	0	1	0	0	1	1	1	0	0	0	0	0	1	0	0	1	0	1	0	0	1	0	1	0		0	0.666667	6
11	1	0	0	0	0	0	1	0	0	0	0	0	0	0	1	0	1	1	0	0	1	0	1	0	0	2	1	1	1	0	0	1	0	1	0	0	0	0	1	0	0	1	0	1	1		0	0.777778	7
12	3	0	3	1	3	2	1	0	3	3	0	3	3	3	3	3	2	3	0	3	2	3	3	3	3	3	3	3	3	3	0	3	3	2	3	2	2	0	3	0	0	2	0	3	2		9	2.66667	24
13	1	0	2	1	1	1	2	0	1	0	0	0	1	2	2	1	2	1	0	0	3	2	3	3	0	2	3	2	1	1	0	1	0	3	0	0	3	0	1	0	0	3	0	3	0		6	2.33333	21
14	1	0	2	0	0	0	3	0	3	0	0	2	1	0	2	0	0	0	3	0	1	1	3	0	2	1	1	0	2	1	0	0	2	1	0	0	1	0	0	0	0	2	0	2	0		5	1.66667	15
15	1	0	0	1	1	0	1	0	2	0	0	0	0	0	2	0	0	1	1	0	2	0	3	2	0	2	2	2	2	0	0	0	0	1	0	0	3	0	2	0	0	2	0	2	0		7	2	18
16	1	0	3	1	1	0	3	0	2	1	0	2	0	1	0	0	1	2	1	0	1	2	2	1	1	0	2	2	2	2	0	0	2	2	1	0	2	0	2	0	0	2	0	2	0		9	2	18
20	1	0	0	0	0	0	2	0	2	0	0	2	0	0	1	0	0	1	1	0	1	1	1	0	1	1	1	1	1	1	0	0	1	0	1	0	1	0	0	0	0	1	0	1	0		1	1	9
21	2	0	1	0	0	0	0	0	2	2	0	3	0	0	0	0	0	2	0	0	0	3	3	2	3	3	2	2	3	3	0	0	3	3	3	0	2	0	0	0	0	2	0	3	0		9	2.44444	22
22	2	0	2	0	1	1	3	0	1	1	0	0	0	0	2	0	0	0	3	0	1	2	0	0	0	2	0	0	0	0	0	1	0	1	1	0	0	0	0	0	0	0	0	0	0		0	0.222222	2
24	3	0	3	1	1	2	3	1	3	3	0	3	3	3	3	3	3	3	3	0	3	3	3	3	3	3	3	3	3	3	0	0	3	3	3	0	3	0	3	0	0	3	0	3	0		9	3	27
																																													Mean		4.94118	1.70771	15.3694
																																													SE		0.913424	0.209956	1.8896
																																													SD		3.76614	0.865669	7.79102
[truncated: 13 more columns]
